# Supplementary material for: Chiral Indolizinium Salts Derived from 2-Pyridinecarbaldehyde—First Diastereoselective Syntheses of (−)-1-epi-lentiginosine
Source: MDPI journal article supplement (doi:10.3390/molecules28093719), 2023-04-25

## Supporting information

Chiral indolizinium salts derived from 2-pyridinecarbaldehyde. First diastereoselective syntheses of (–)-1-*epi*-lentiginosine

Hisami Rodriguez-Matsui <sup>1</sup>, David M. Aparicio <sup>1</sup>, María L. Orea <sup>1</sup>, Jorge R. Juárez <sup>1</sup>, Victor Gómez-Calvario <sup>1</sup>, Dino Gnecco <sup>1</sup>, Alan Carrasco-Carballo <sup>2</sup>, and Joel L. Terán <sup>1,\*</sup>

<sup>1</sup>Centro de Química, Instituto de Ciencias, Benemérita Universidad Autónoma de Puebla, Edif. IC-9 Complejo de Ciencias C.U. 72570 Puebla, México

<sup>2</sup>Laboratorio de Elucidación y Síntesis en Química Orgánica, Benemérita Universidad Autónoma de Puebla, C.U., 72570 Puebla, México

### Table of Contents

|                                                             |                |
|-------------------------------------------------------------|----------------|
| <b>1. General Information.....</b>                          | <b>.....S2</b> |
| <b>2. Characterization of Products....</b>                  | <b>.....S3</b> |
| <b>3. <sup>1</sup>H and <sup>13</sup>C NMR Spectra.....</b> | <b>.....S7</b> |
| <b>4. X-ray crystallography data</b>                        | <b>S28</b>     |

## General Information

All reagents and solvents were purchased from commercial sources. The  $^1\text{H}$  and  $^{13}\text{C}$  spectra were determined with a Bruker Avance III Spectrometer ( $\text{CDCl}_3$  or  $\text{CD}_3\text{OD}$  solvents) operating at 500 and 125 MHz, respectively. The chemical shifts were reported in parts per million (ppm), downfield from  $\text{SiMe}_4$  ( $\delta$  0.0) and relative to the signal of chloroform- $d$  ( $\delta$  7.26, singlet). Multiplicities were afforded as: s (singlet); d (doublet); t (triplet); q (quartet); dd (doublets of doublet); ddd (doublet of doublets of doublets); or m (multiplets). The number of protons for a given resonance is indicated by nH. Coupling constants were reported as a  $J$  value in Hz. Thin layer chromatography (TLC) was used to monitor the reaction on Merck 60 F254 precoated silica gel plate (0.2 mm thickness). Optical rotations were determined at room temperature with a Perkin-Elmer 341 polarimeter, using a 1 dm cell with a total volume of 1mL, and are referenced to the D-line of sodium. Mass spectra were recorded with a JEOL Station JMS-700 instrument at a voltage of 70 eV. X-Ray Diffraction analysis was performed on a diffractometer STOE Stadivari using Ag- $\text{K}\alpha$  radiation ( $\lambda = 0.56083 \text{ \AA}$ , AXO micro-source) and equipped with a Dectris Pilatus-100 K detector. Intensities were collected at 295 K, and structures were refined using the current release of SHELXL (2018/3). The products were purified by column chromatography on silica gel 60 (63-200nm).

**((2*R*,4*R*)-4-phenyl-2-propyloxazolidin-3-yl)((2*R*,3*S*)-3-(pyridin-2-yl)oxiran-2-yl)methanone, 2a**

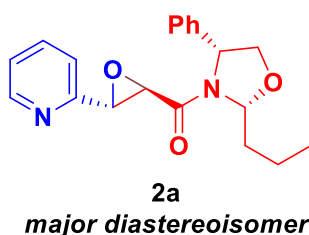

Yellow oil, 85% yield. Major diastereoisomer:  $^1\text{H}$  NMR (500 MHz,  $\text{CDCl}_3$ )  $\delta$  8.33 (d,  $J = 4.8$  Hz, 1H), 7.45 (m, 1H), 7.13 (m, 2H), 7.07 (dd,  $J = 7.5$ , 4.9 Hz, 1H), 7.02 (t,  $J = 7.6$  Hz, 2H), 6.90 (m, 2H), 5.51 (dd,  $J = 9.2$ , 2.5 Hz, 1H), 5.10 (t,  $J = 6.6$  Hz, 1H), 4.33 (dd,  $J = 9.1$ , 6.9 Hz, 1H), 3.89 (dd,  $J = 9.2$ , 6.3 Hz, 1H), 3.81 (d,  $J = 1.8$  Hz, 1H), 3.59 (d,  $J = 1.9$  Hz, 1H), 2.15 (dddd,  $J = 16.3$ , 9.3, 6.2, 2.5 Hz, 1H), 1.69 (dtd,  $J = 14.2$ , 9.4, 5.3 Hz, 1H), 1.51 (m, 3H), 0.96 (t,  $J = 7.4$  Hz, 3H).  $^{13}\text{C}$  NMR (125 MHz,  $\text{CDCl}_3$ )  $\delta$  165.2, 149.4, 139.2, 136.2, 128.9, 128.8, 127.8, 126.0, 123.2, 121.0, 91.7, 73.7, 60.4, 57.9, 56.4, 35.2, 18.4, 13.7. **HRMS(ESI):** Calcd for  $\text{C}_{20}\text{H}_{22}\text{N}_2\text{O}_3$ : 338.1630 Found: 338.1629.

**((2*S*,3*S*)-2-bromo-3-hydroxy-1-((2*R*,4*R*)-4-phenyl-2-propyloxazolidin-3-yl)-3-(pyridin-2-yl)propan-1-one, 3**

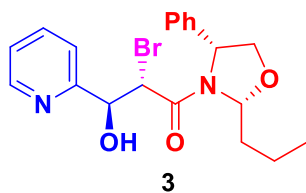

White solid, mp = 129 °C, 98% yield. Major rotamer:  $^1\text{H}$  NMR (500 MHz,  $\text{CDCl}_3$ )  $\delta$  8.55 (dt,  $J = 4.0$ , 0.8 Hz, 1H), 7.72 (m, 1H), 7.72-7.33 (m, 5H), 7.25 (m, 1H), 6.74 (m, 1H), 5.28 (dd,  $J = 9.0$ , 2.5 Hz, 1H), 5.08 (dd,  $J = 6.6$ , 4.6 Hz, 1H), 4.99 (br, 1H), 4.73 (d,  $J = 5.5$  Hz, 1H), 4.14 (dd,  $J = 8.9$ , 6.7 Hz, 1H), 3.98 (dd,  $J = 8.9$ , 4.6 Hz, 1H), 2.17 (m, 1H), 1.70 (m, 2H), 1.49 (m, 2H), 0.99 (t,  $J = 7.5$  Hz, 3H).  $^{13}\text{C}$  NMR (125 MHz,  $\text{CDCl}_3$ )  $\delta$  169.8, 159.4, 138.3, 137.1, 129.1, 126.6, 125.1, 123.3, 122.0, 91.2, 75.9, 73.8, 61.2, 45.6, 34.9, 18.6, 13.9. **HRMS(ESI):** Calcd for  $\text{C}_{20}\text{H}_{23}\text{BrN}_2\text{O}_3$ : 418.0892 Found: 418.0890.

**((2*S*,3*S*)-3-(pyridin-2-yl)oxiran-2-yl)methanol.**

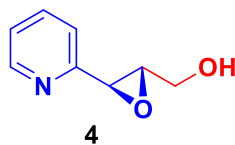

Colorless oil, 73% yield.  $^1\text{H}$  NMR (500 MHz,  $\text{CDCl}_3$ )  $\delta$  8.59-8.52 (m, 1H), 7.70 (td,  $J = 7.8$ , 1.8 Hz, 1H), 7.30 – 7.27 (m, 1H), 7.25 (ddd,  $J = 7.5$ , 4.9, 1.2 Hz, 1H), 4.08 (d,  $J = 2.1$  Hz, 1H), 4.05 (dt,  $J = 12.8$ , 2.4 Hz, 1H), 3.85 (dd,  $J = 12.8$ , 4.0 Hz, 1H), 3.39 (dq,  $J = 4.2$ , 2.0 Hz, 1H).  $^{13}\text{C}$  NMR (125 MHz,  $\text{CDCl}_3$ )  $\delta$  156.4, 149.4, 137.0, 123.3, 120.3, 61.8, 61.3, 56.0. **HRMS(ESI):** Calcd for  $\text{C}_8\text{H}_9\text{NO}_2$ : 151.0633 Found: 151.0630.

**((2*S*,3*S*)-3-(pyridin-2-yl)oxiran-2-yl)methyl 4-methylbenzenesulfonate, 5.**

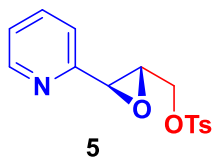

Yellow oil, 94% yield.  $^1\text{H}$  NMR (500 MHz,  $\text{CDCl}_3$ )  $\delta$  8.47 (ddd,  $J = 4.9, 1.8, 0.9$  Hz, 1H), 7.77 – 7.70 (m, 2H), 7.62 (td,  $J = 7.7, 1.8$  Hz, 1H), 7.32 – 7.24 (m, 2H), 7.18 (ddd,  $J = 7.6, 4.9, 1.2$  Hz, 1H), 7.15 (dt,  $J = 7.9, 1.1$  Hz, 1H), 4.33 (dd,  $J = 11.6, 3.2$  Hz, 1H), 4.12 – 3.97 (m, 1H), 3.84 (d,  $J = 2.0$  Hz, 1H), 3.38 (ddd,  $J = 5.9, 3.1, 1.9$  Hz, 1H), 2.36 (s, 3H).  $^{13}\text{C}$  NMR (125 MHz,  $\text{CDCl}_3$ )  $\delta$  153.9, 148.3, 144.2, 136.1, 131.5, 129.0, 127.0, 122.6, 119.5, 68.2, 56.7, 55.3, 20.7. HRMS(ESI): Calcd for  $\text{C}_{15}\text{H}_{15}\text{NO}_4\text{S}$ : 305.0722 Found: 305.0721.

**Major diastereoisomer (1*R*,2*S*)-1-chloro-2-hydroxy-2,3-dihydro-1*H*-indolizin-4-ium 4-methylbenzenesulfonate, 6a.**

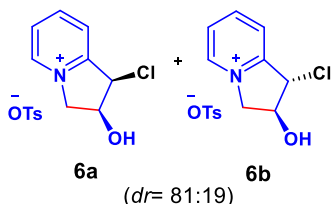

Black oil, quantitative yield. Inseparable diastereomeric mixture. Major diastereoisomer:  $^1\text{H}$  NMR (500 MHz,  $\text{CDCl}_3$ )  $\delta$  9.13 (d,  $J = 6.0$  Hz, 1H), 8.66 (td,  $J = 7.9, 1.3$  Hz, 1H), 8.25 (d,  $J = 8.0$  Hz, 1H), 8.14 (t,  $J = 6.9$  Hz, 1H), 7.48 (d,  $J = 8.0$  Hz, 2H), 7.12 (d,  $J = 7.9$  Hz, 2H), 5.94 (d,  $J = 4.8$  Hz, 1H), 4.97 (dd,  $J = 13.3, 4.6$  Hz, 1H), 4.89 (td,  $J = 4.6, 2.7$  Hz, 1H), 4.79 (dd,  $J = 13.4, 2.9$  Hz, 1H), 2.29 (s, 3H).  $^{13}\text{C}$  NMR (125 MHz,  $\text{CDCl}_3$ )  $\delta$  154.8, 147.2, 146.0, 143.0, 138.2, 128.6, 128.0, 125.9, 125.4, 69.8, 63.7, 61.2, 21.3. HRMS(ESI): Calcd for  $\text{C}_{15}\text{H}_{16}\text{ClNO}_4\text{S}$ : 341.0488 Found: 341.0486.

**Major diastereoisomer (1*R*,2*S*)-1,2-dihydroxy-2,3-dihydro-1*H*-indolizin-4-ium 4-methylbenzenesulfonate, 10a.**

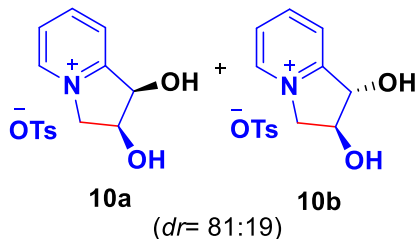

Black oil, quantitative yield. Inseparable diastereomeric mixture. Major diastereoisomer:  $^1\text{H}$  NMR (500 MHz,  $\text{CDCl}_3$ )  $\delta$  8.70 (d,  $J = 5.9$  Hz, 1H), 8.46 (t,  $J = 7.7$  Hz, 1H), 8.03 (d,  $J = 8.0$  Hz, 1H), 7.88 (t,  $J = 6.7$  Hz, 1H), 7.58 (d,  $J = 7.2$  Hz, 2H), 7.25 (d,  $J = 6.7$  Hz, 2H), 5.65 – 5.36 (m, 1H), 4.81 (m, 3H), 2.29 (s, 3H).  $^{13}\text{C}$  NMR (125 MHz,  $\text{CDCl}_3$ )  $\delta$  156.7, 146.3, 142.4, 141.4, 139.5, 129.4, 127.2, 125.3, 124.6, 74.2, 70.4, 63.2, 20.5. HRMS(ESI): Calcd for  $\text{C}_{15}\text{H}_{17}\text{ClNO}_5\text{S}$ : 323.0827 Found: 323.0825.

**(1*R*,2*S*,8*aS*)-1-chloro-1,2,3,5,8,8*a*-hexahydroindolizin-2-ol, 11a.**

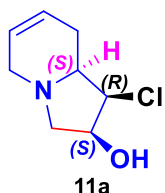

White solid, mp = 140°C, 74% yield. <sup>1</sup>H NMR (500 MHz, CDCl<sub>3</sub>) δ 5.78 (ddd, *J* = 10.0, 5.3, 2.4 Hz, 1H), 5.67 (dtd, *J* = 10.1, 2.9, 1.4 Hz, 1H), 4.51 (dt, *J* = 16.9, 5.2 Hz, 2H), 3.48 (dq, *J* = 16.3, 2.3 Hz, 1H), 3.14 (dd, *J* = 10.6, 4.3 Hz, 1H), 2.89 (br, 1H), 2.81 – 2.66 (m, 2H), 2.56 (ddq, *J* = 14.9, 7.8, 2.4 Hz, 1H), 2.46 (br, 1H), 2.10 (dd, *J* = 17.0, 4.4 Hz, 1H). <sup>13</sup>C NMR (125 MHz, CDCl<sub>3</sub>) δ 124.7, 124.5, 70.4, 66.7, 61.3, 60.1, 52.4, 28.0. HRMS(ESI): Calcd for C<sub>8</sub>H<sub>12</sub>ClNO: 173.0607 Found: 173.0605.

**(1*S*,2*S*,8*aR*)-1-chloro-1,2,3,5,8,8*a*-hexahydroindolizin-2-ol, 11b.**

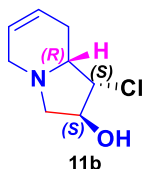

White solid, mp = 136 °C, 14% yield. <sup>1</sup>H NMR (500 MHz, CDCl<sub>3</sub>) δ 5.80 (ddd, *J* = 9.9, 5.3, 2.4 Hz, 1H), 5.69 (dddd, *J* = 9.9, 4.4, 2.9, 1.5 Hz, 1H), 4.54 (ddd, *J* = 6.5, 4.6, 1.5 Hz, 1H), 4.16 (dd, *J* = 4.8, 1.5 Hz, 1H), 3.74 (dd, *J* = 10.5, 6.7 Hz, 1H), 3.52 (ddt, *J* = 16.1, 4.4, 2.1 Hz, 1H), 2.93 (ddd, *J* = 15.9, 4.7, 2.1 Hz, 1H), 2.85 (dt, *J* = 9.4, 4.5 Hz, 1H), 2.53 (dddd, *J* = 17.0, 10.1, 4.5, 2.2 Hz, 1H), 2.25 (d, *J* = 4.6 Hz, 1H), 2.16 – 1.96 (m, 1H). <sup>13</sup>C NMR (125 MHz, CDCl<sub>3</sub>) δ 124.4, 78.6, 67.6, 61.4, 60.5, 52.6, 27.6. HRMS(ESI): Calcd for C<sub>8</sub>H<sub>12</sub>ClNO: 173.0607 Found: 173.0606.

**(1*R*,2*S*,8*aS*)-1-(benzyloxy)-1,2,3,5,8,8*a*-hexahydroindolizin-2-ol, 13a.**

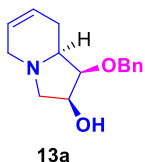

Yellow oil, 80% yield. <sup>1</sup>H NMR (500 MHz, CDCl<sub>3</sub>) δ 7.45 – 7.18 (m, 5H), 5.88 – 5.72 (m, 1H), 5.69 – 5.50 (m, 1H), 4.66 (d, *J* = 11.8 Hz, 1H), 4.59 (d, *J* = 11.8 Hz, 1H), 4.13 (dd, *J* = 9.3, 5.6 Hz, 2H), 3.45 (d, *J* = 16.0 Hz, 1H), 3.24 (d, *J* = 10.7 Hz, 1H), 2.93 (br, 1H), 2.71 (d, *J* = 16.0 Hz, 1H), 2.63 – 2.56 (m, 1H), 2.39 (dd, *J* = 10.7, 7.3 Hz, 1H), 2.18 (dd, *J* = 10.0, 4.1 Hz, 1H), 2.12 – 1.94 (m, 1H). <sup>13</sup>C NMR (125 MHz, CDCl<sub>3</sub>) δ 137.5, 128.5, 127.9, 127.9, 125.4, 124.1, 76.4, 72.5, 70.8, 63.1, 59.2, 52.5, 25.1. HRMS(ESI): Calcd for C<sub>15</sub>H<sub>19</sub>NO<sub>2</sub>: 245.1416 Found: 245.1414.

**(1*R*,2*S*,8*aS*)-1-chlorooctahydroindolizin-2-ol, 12a.**

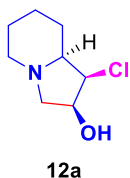

White solid, mp = 148 °C, quantitative yield. <sup>1</sup>H NMR (500 MHz, CDCl<sub>3</sub>) δ 4.42 (dt, *J* = 9.3, 5.2 Hz, 1H), 4.30 (dd, *J* = 5.7, 3.3 Hz, 1H), 2.79 (dt, *J* = 11.3, 3.4 Hz, 1H), 2.65 (dd, *J* = 11.0, 4.7 Hz, 1H), 2.53 (dd, *J* = 11.0, 9.2 Hz, 1H), 2.35 (dt, *J* = 10.8, 3.0 Hz, 1H), 1.98 (td, *J* = 11.9, 3.0 Hz, 1H), 1.63 (dt, *J* = 13.3, 3.4 Hz, 1H), 1.60 – 1.52 (m, 1H), 1.48 – 1.42 (m, 1H), 1.42 – 1.34 (m, 1H), 1.29 (qt, *J* = 13.1, 4.2 Hz, 1H), 1.12 (qt, *J* = 13.1, 4.0 Hz, 1H). <sup>13</sup>C NMR (125 MHz, CDCl<sub>3</sub>) δ 69.2, 66.0, 65.7, 57.9, 52.4, 26.1, 24.0, 22.7. HRMS(ESI): Calcd for C<sub>8</sub>H<sub>14</sub>ClNO: 175.0764 Found: 175.0763.

**(-)-1-*epi* lentiginosine**

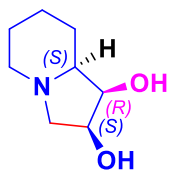

Colorless oil, 87% yield.  $[\alpha]_{\text{D}}^{20} = -15.5$  ( $c$  0.3, MeOH).  $^1\text{H}$  NMR (500 MHz,  $\text{CDCl}_3$ )  $\delta$  4.22 (ddd,  $J = 7.4, 5.9, 1.8$  Hz, 1H), 3.98 (dd,  $J = 6.0, 4.0$  Hz, 1H), 3.69 – 3.61 (m, 2H), 3.04 (dd,  $J = 11.1, 3.5$  Hz, 1H), 2.94 (dd,  $J = 10.7, 1.7$  Hz, 1H), 2.33 (dd,  $J = 10.7, 7.0$  Hz, 1H), 1.97 – 1.88 (m, 1H), 1.88 – 1.81 (m, 2H), 1.78 – 1.68 (m, 1H), 1.67 – 1.49 (m, 3H).  $^{13}\text{C}$  NMR (125 MHz,  $\text{CDCl}_3$ )  $\delta$  76.6, 69.7, 62.5, 53.1, 29.7, 25.1, 24.9, 23.8. HRMS(ESI): Calcd for  $\text{C}_8\text{H}_{15}\text{NO}_2$ : 157.1103 Found: 157.1102.

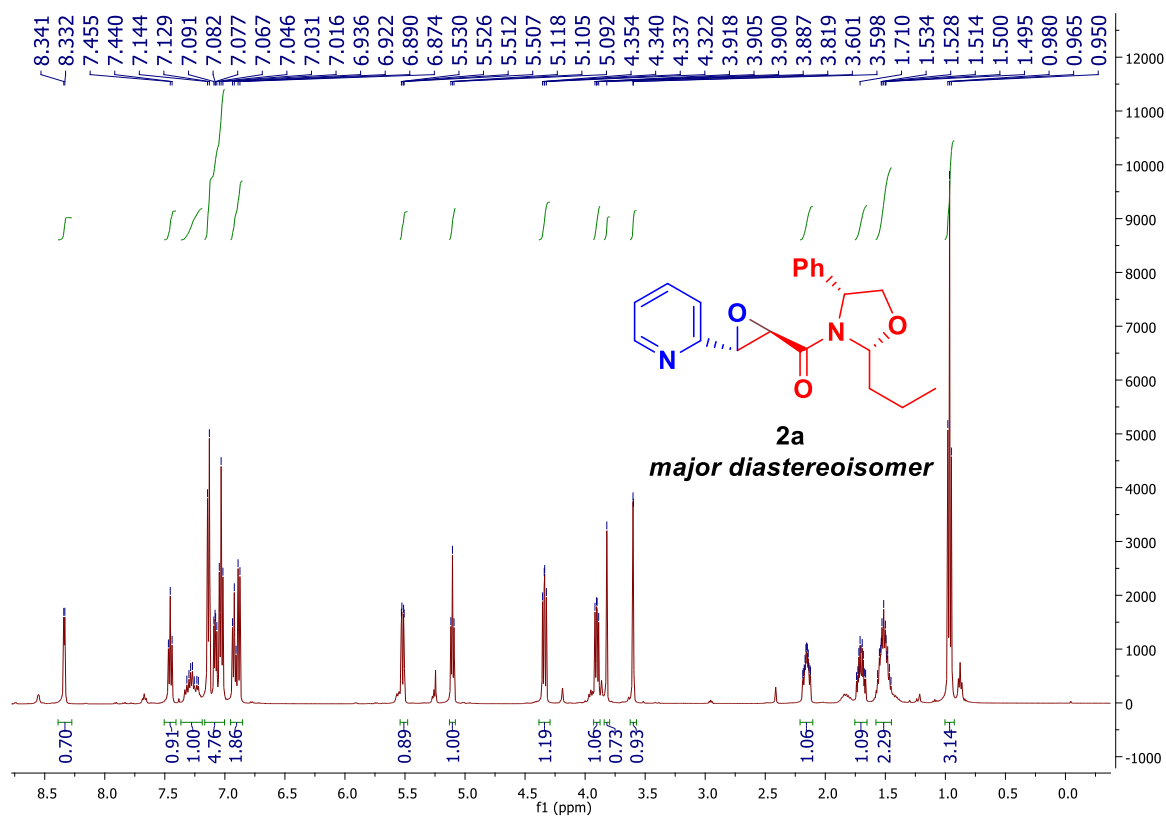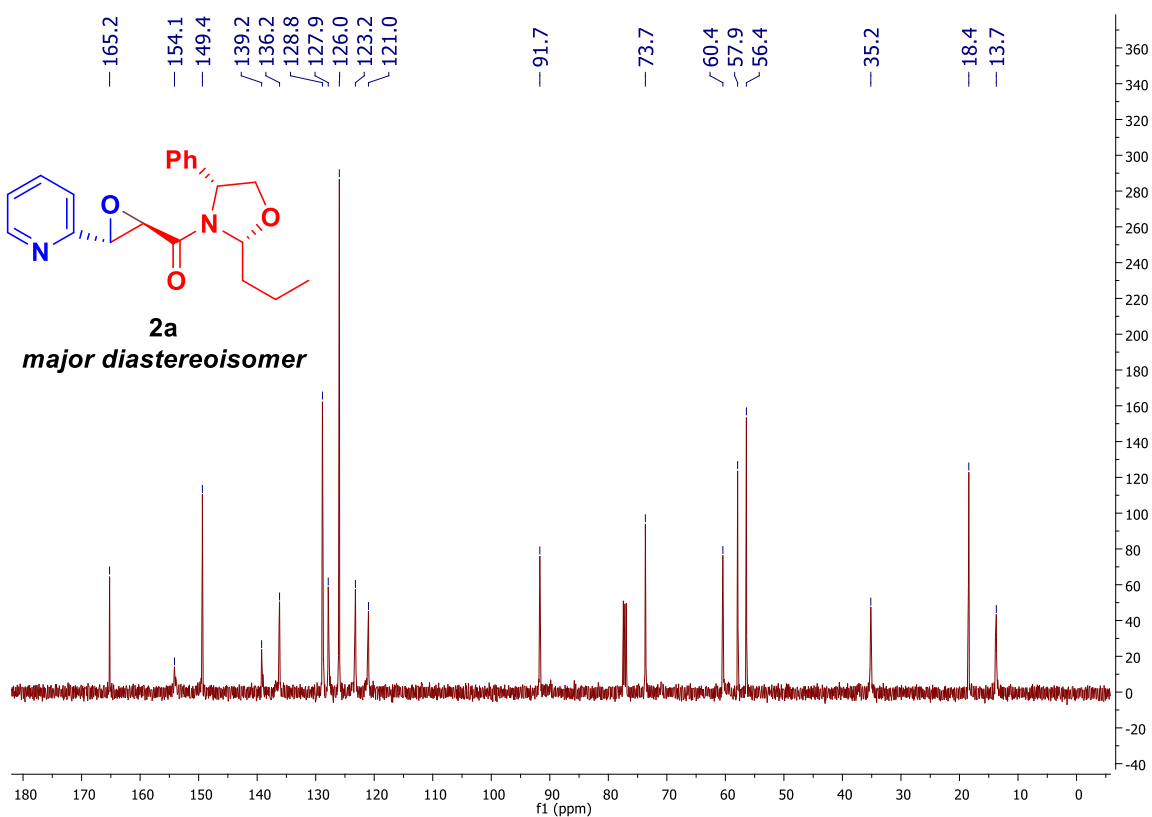

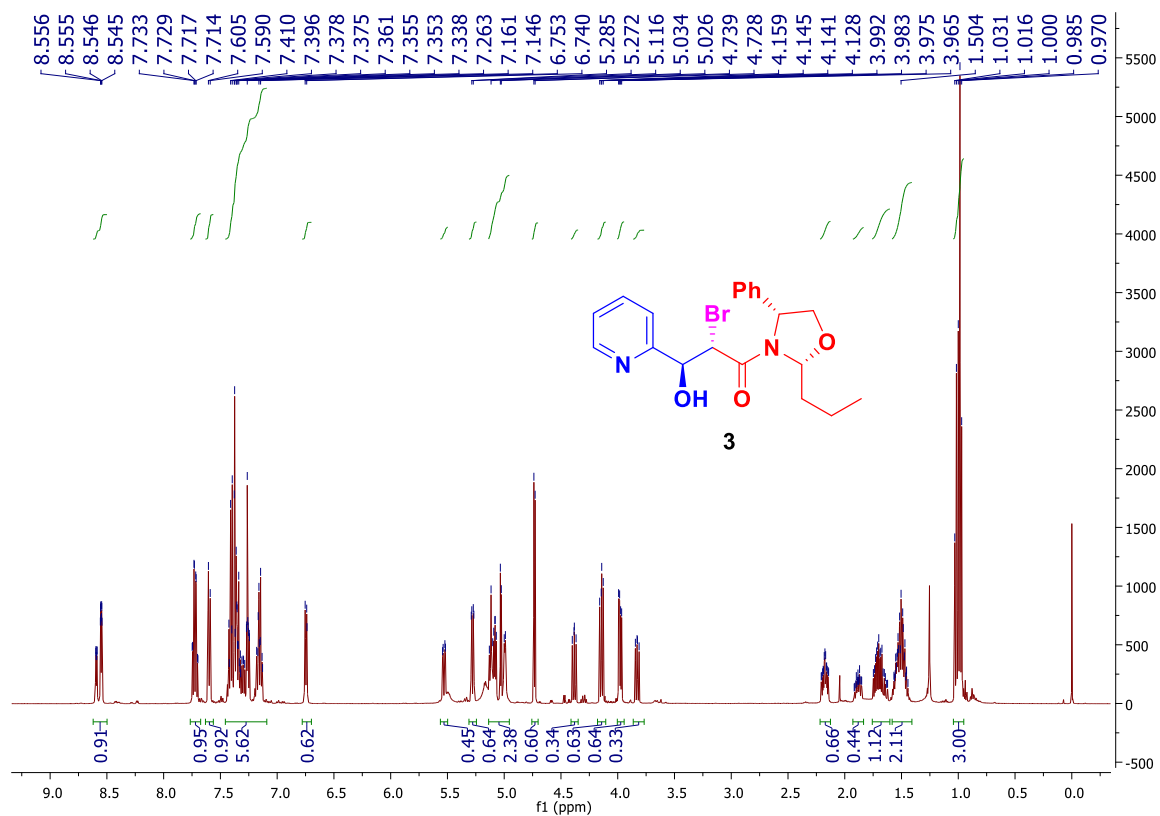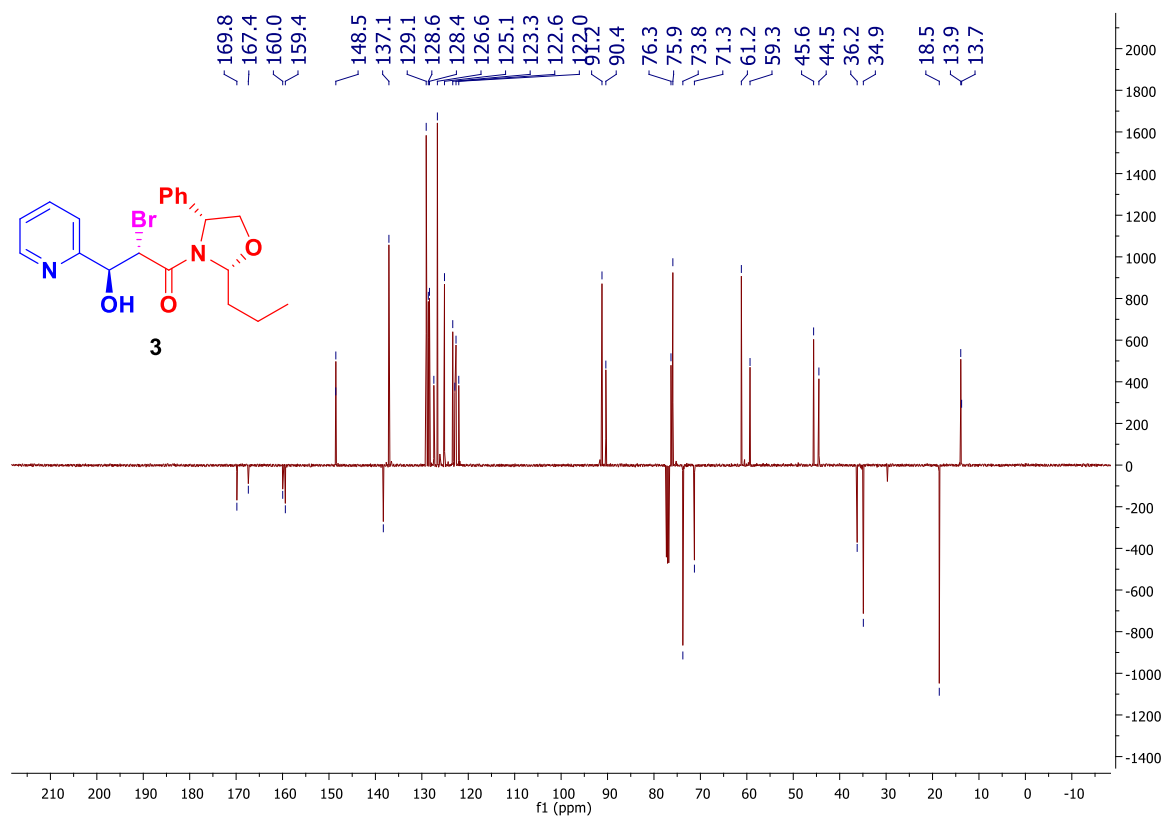



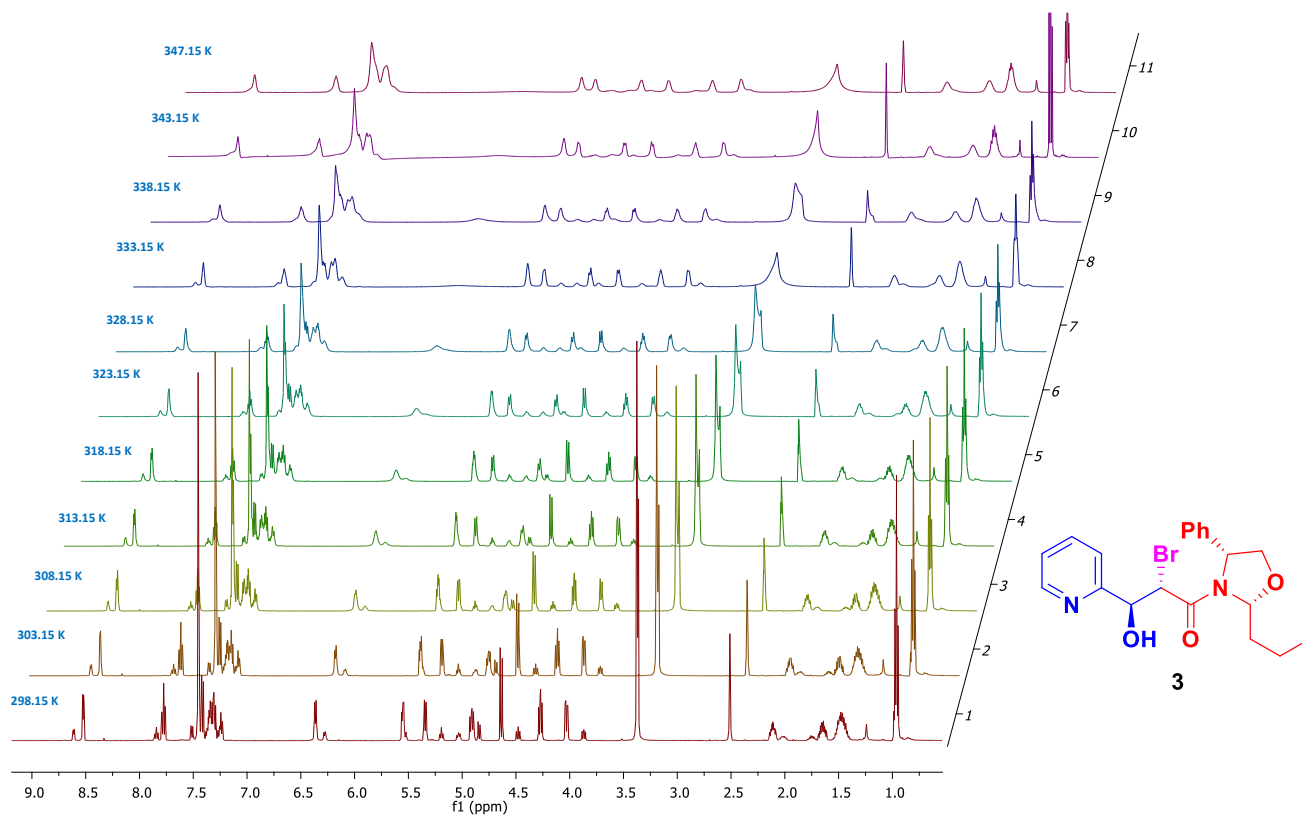

Variable temperature NMR experiments.

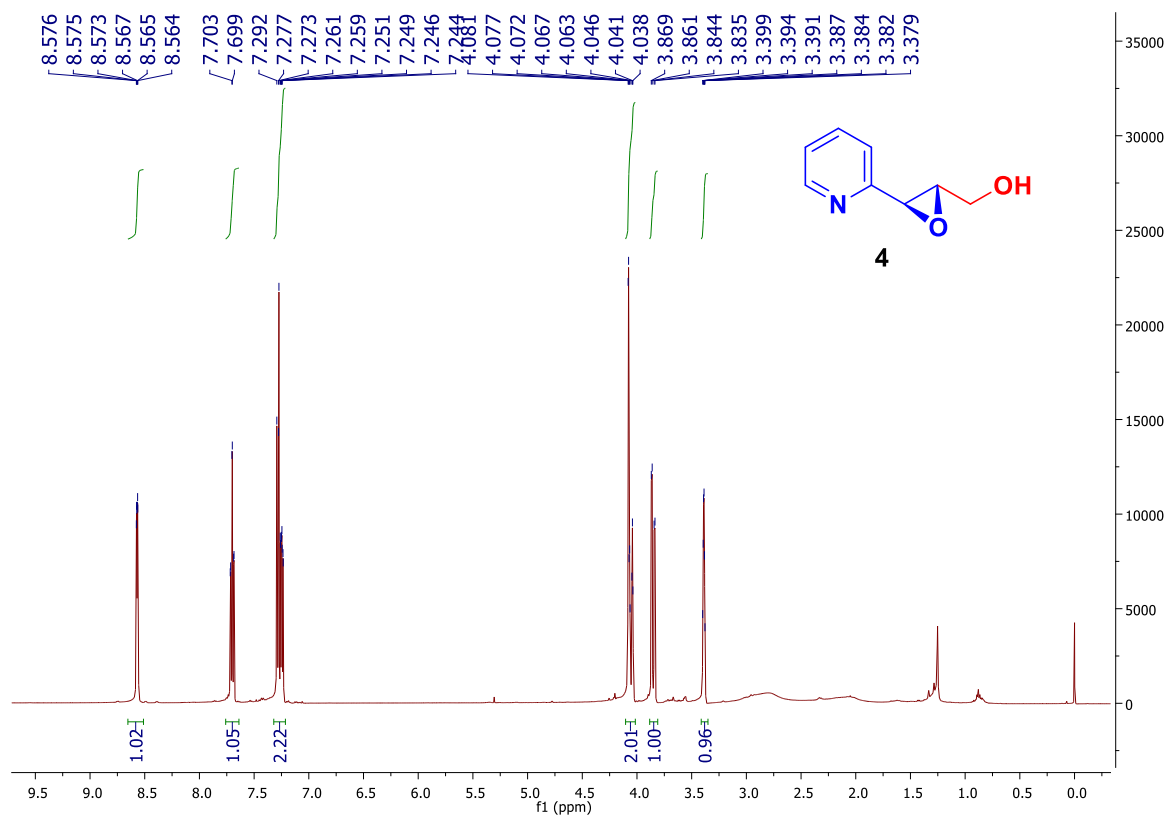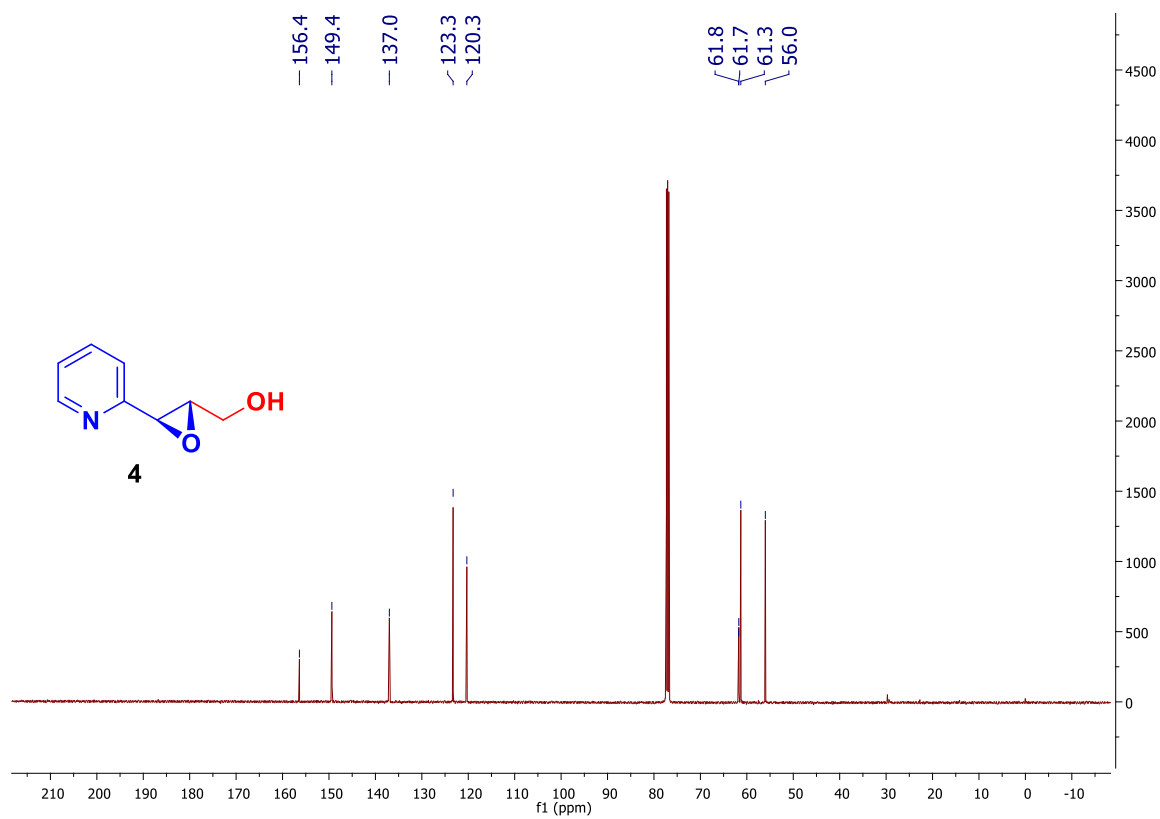

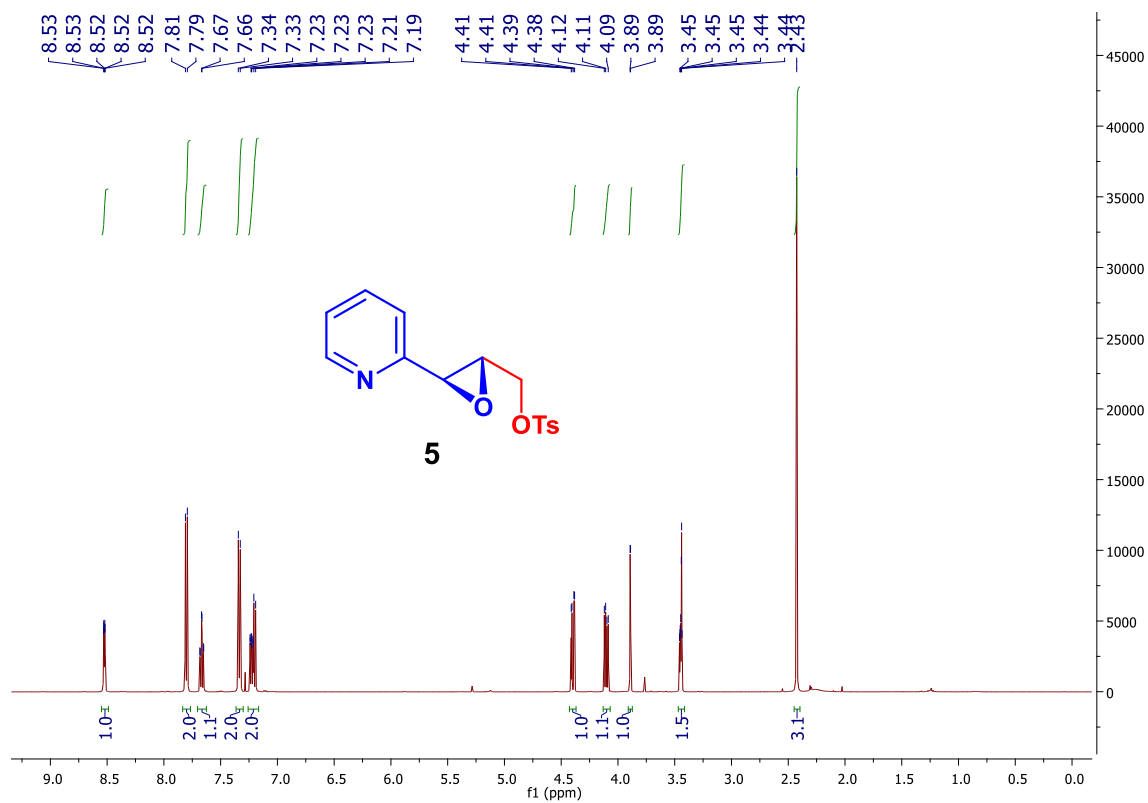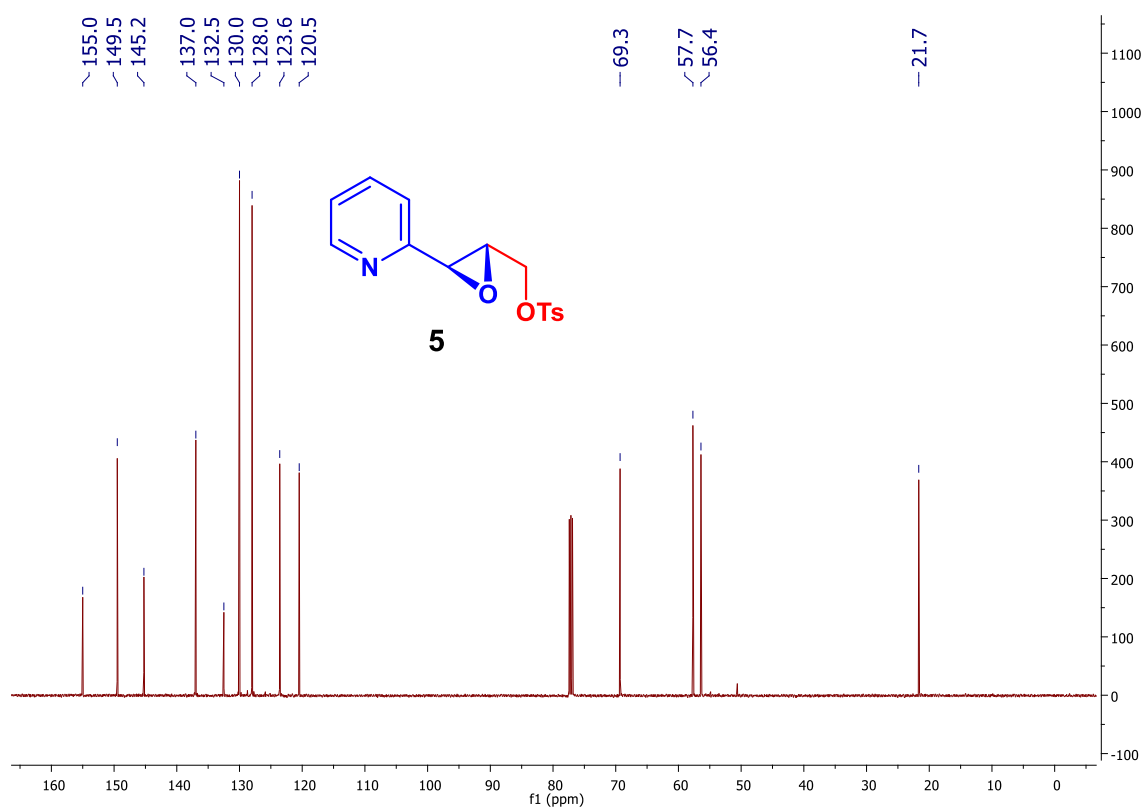

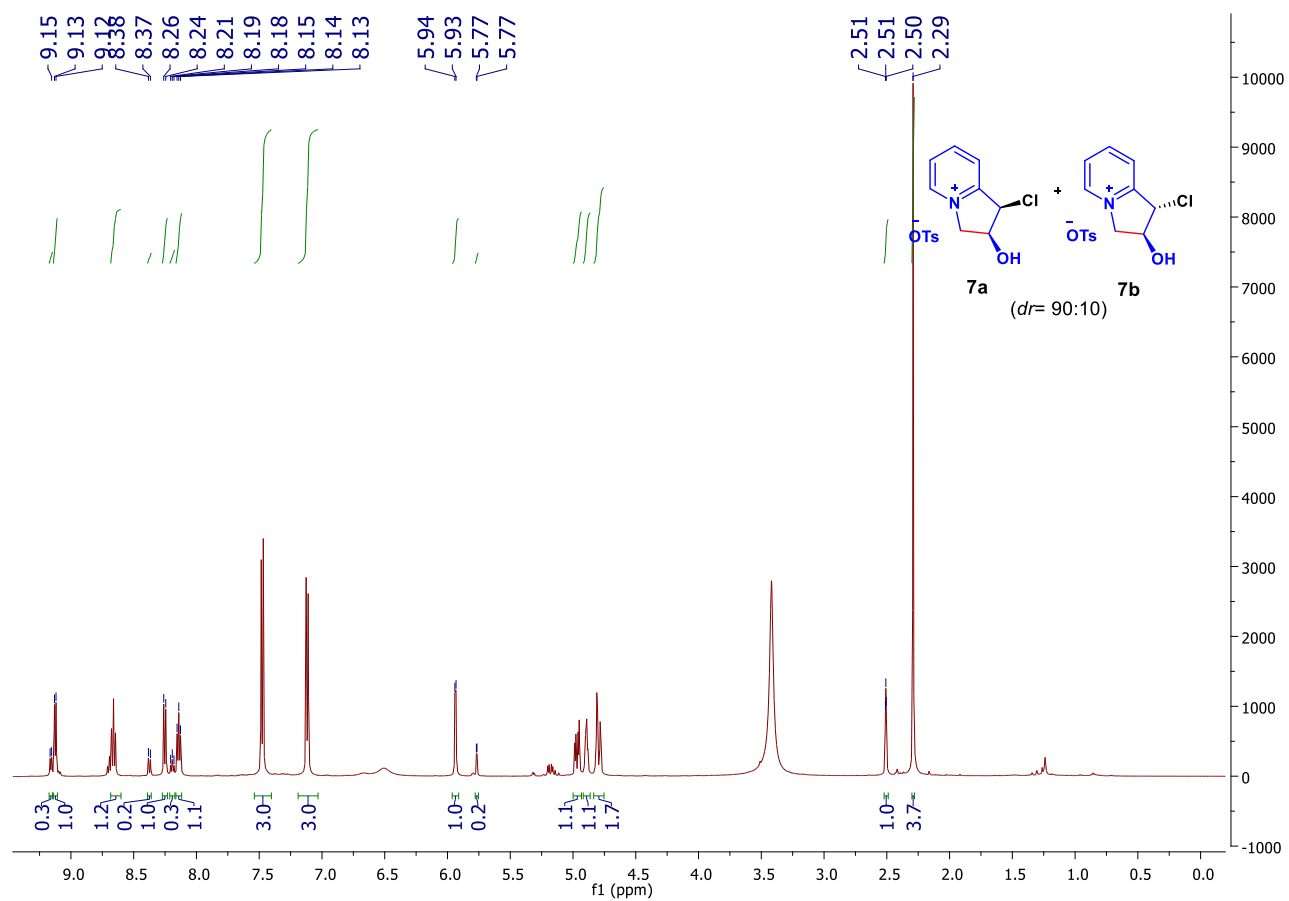

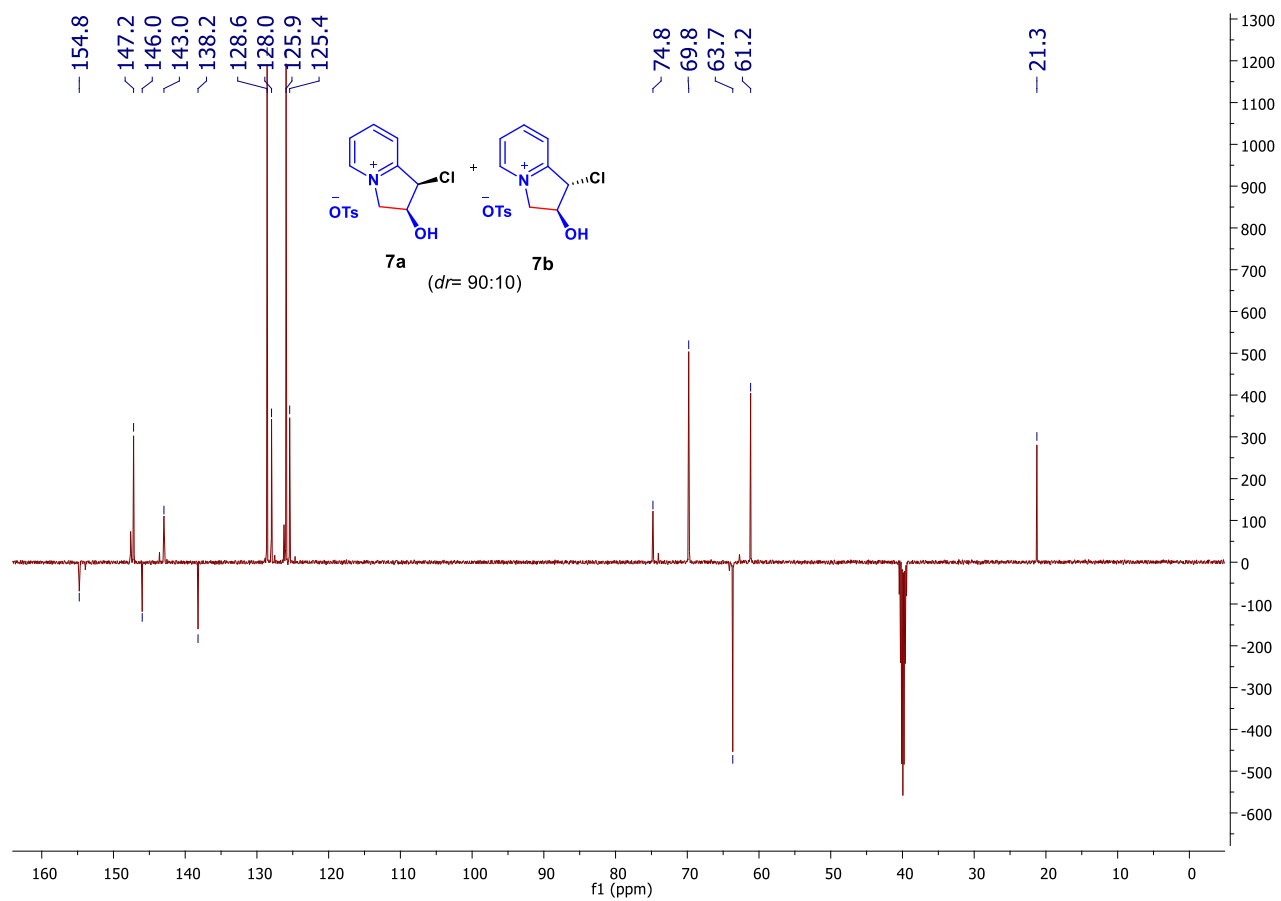

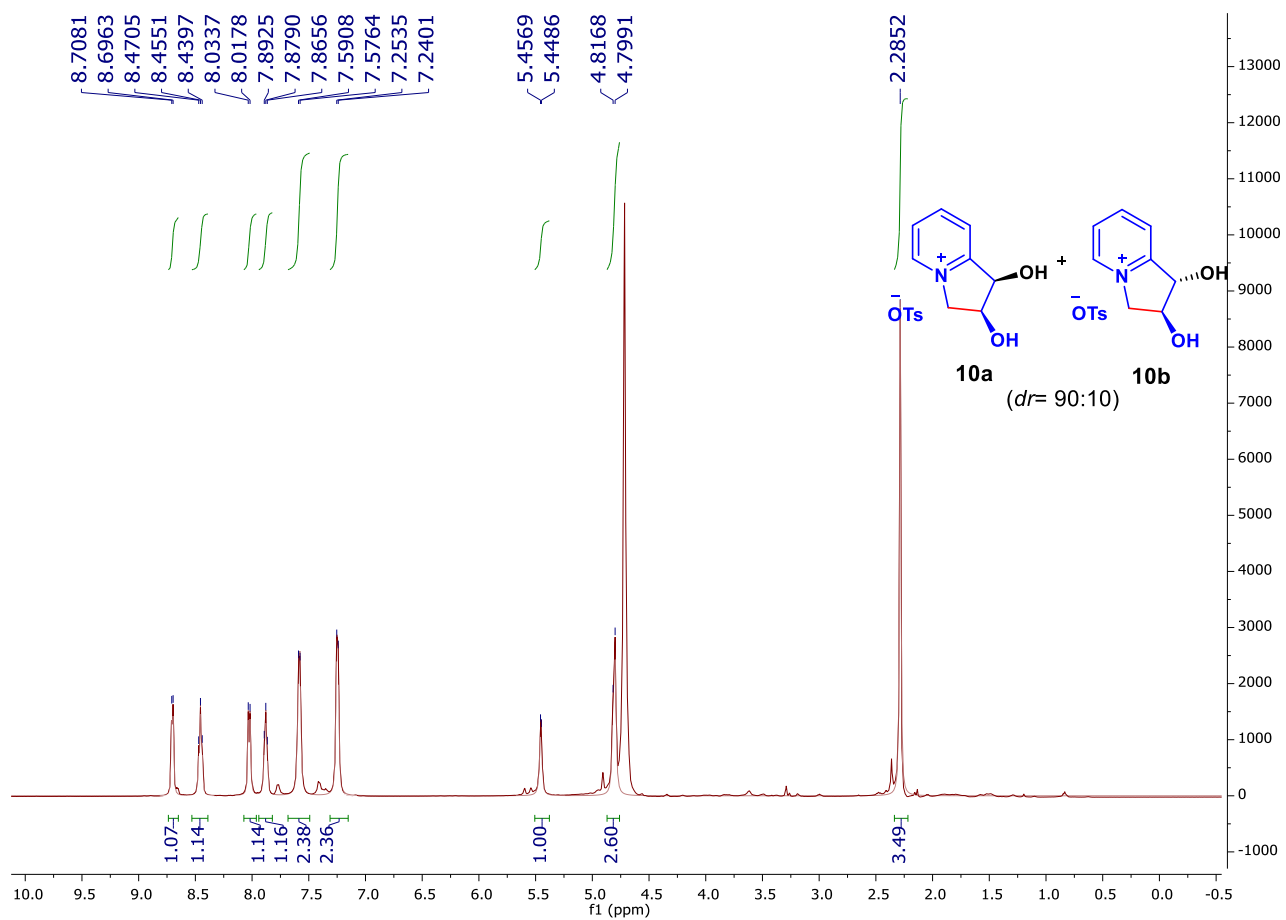

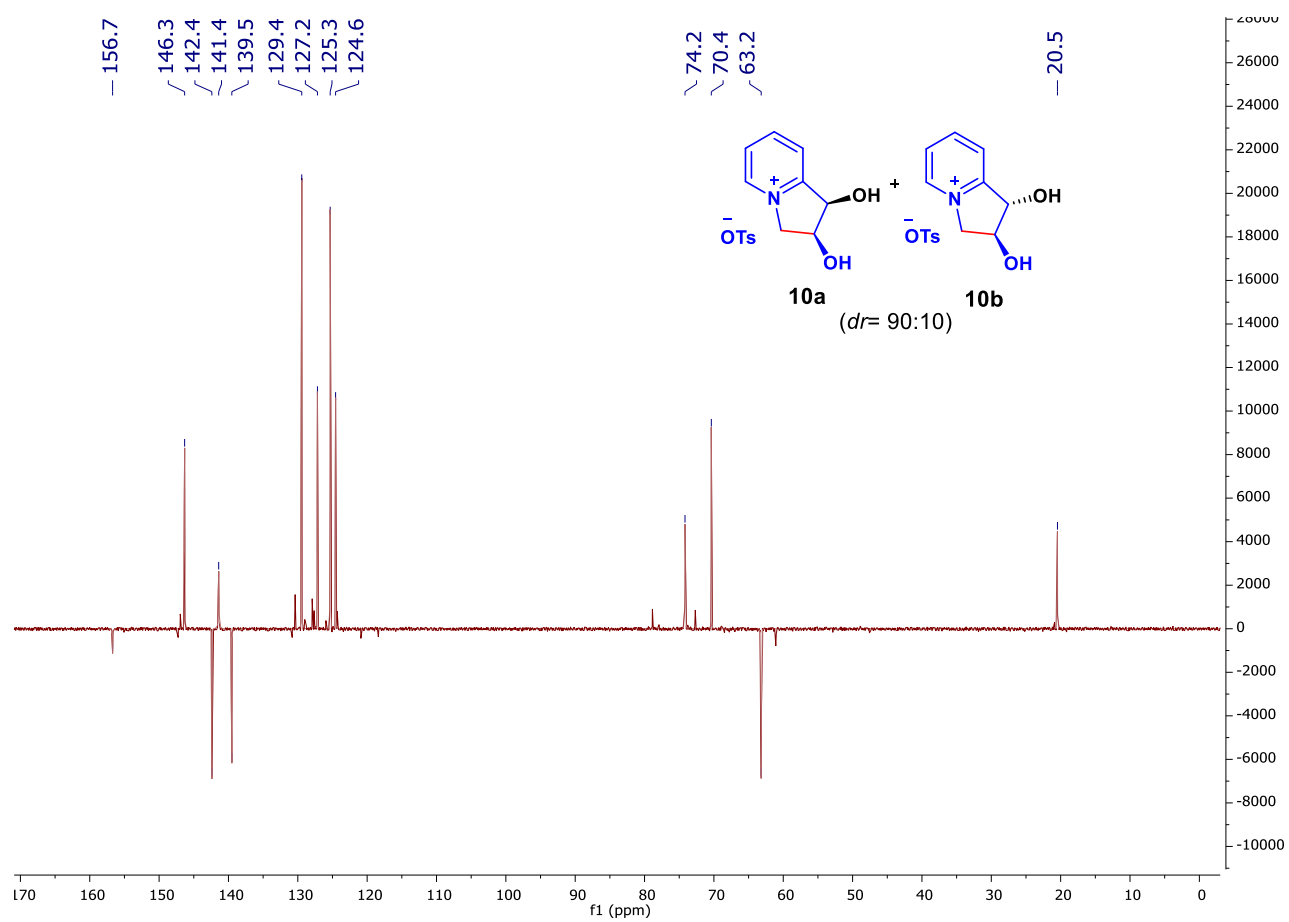

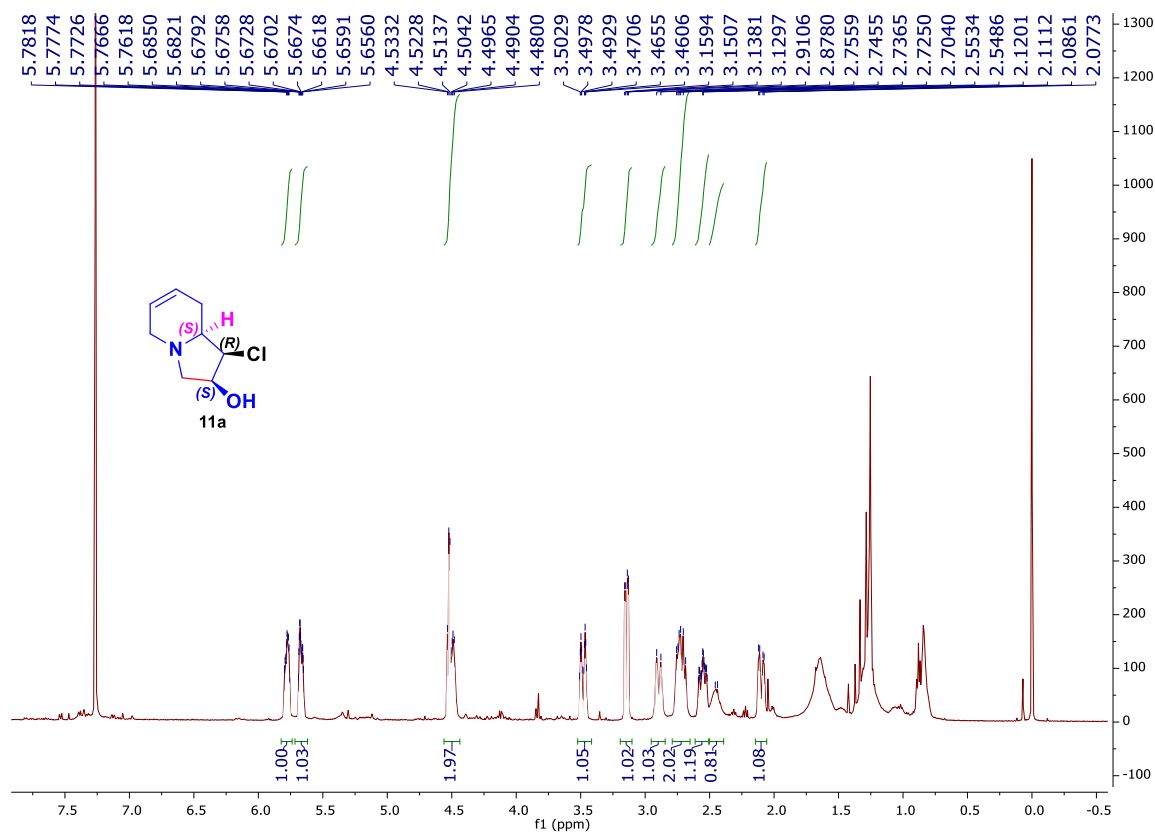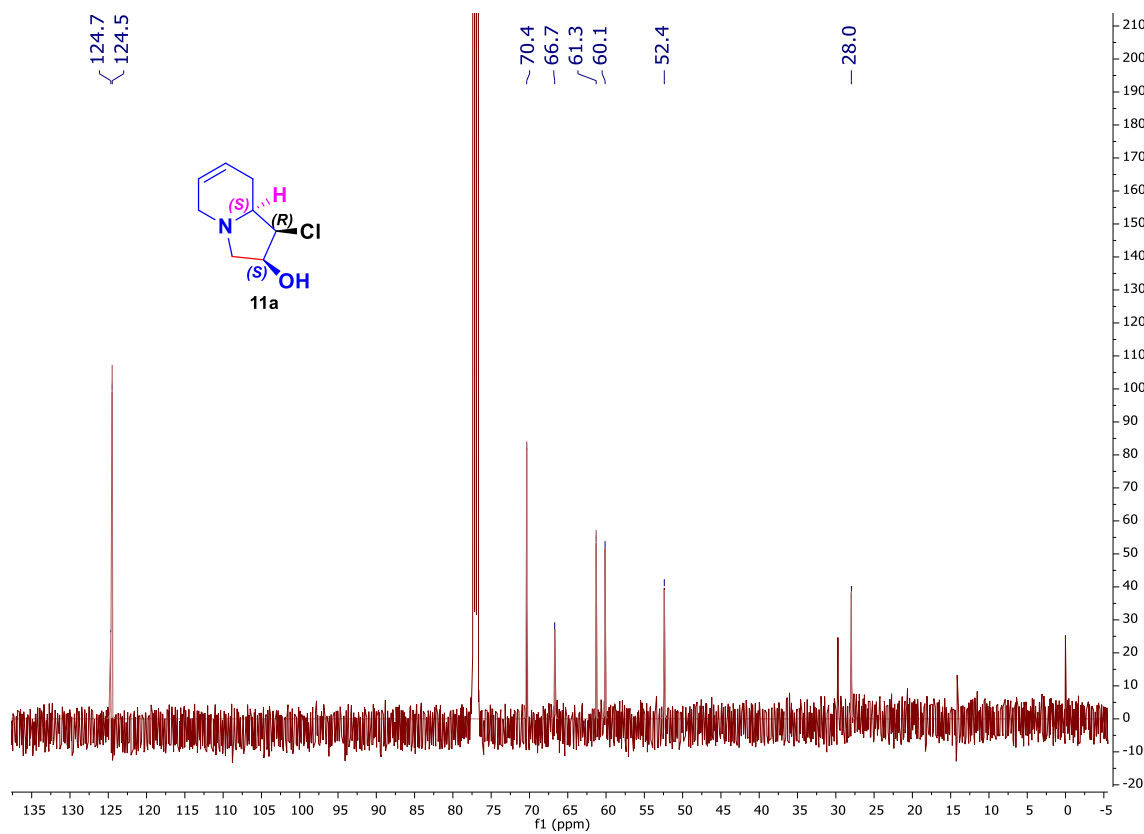



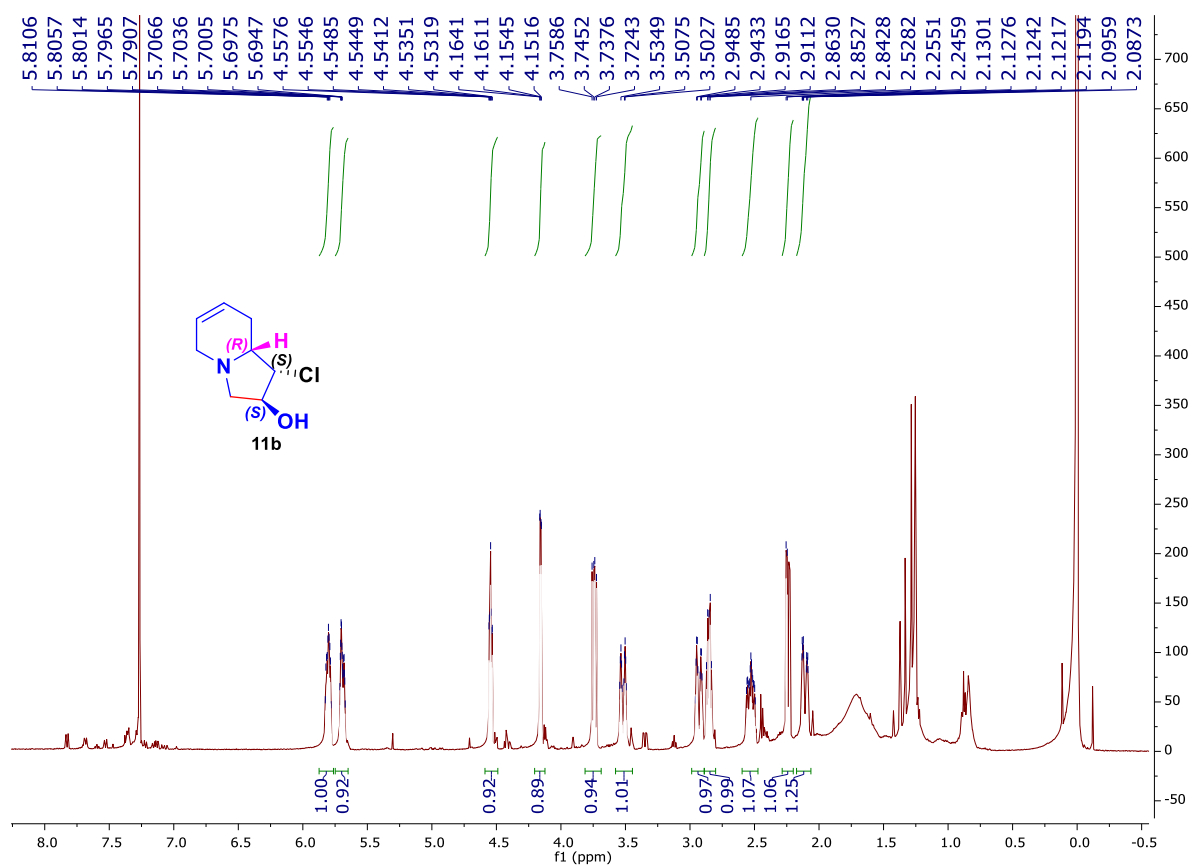

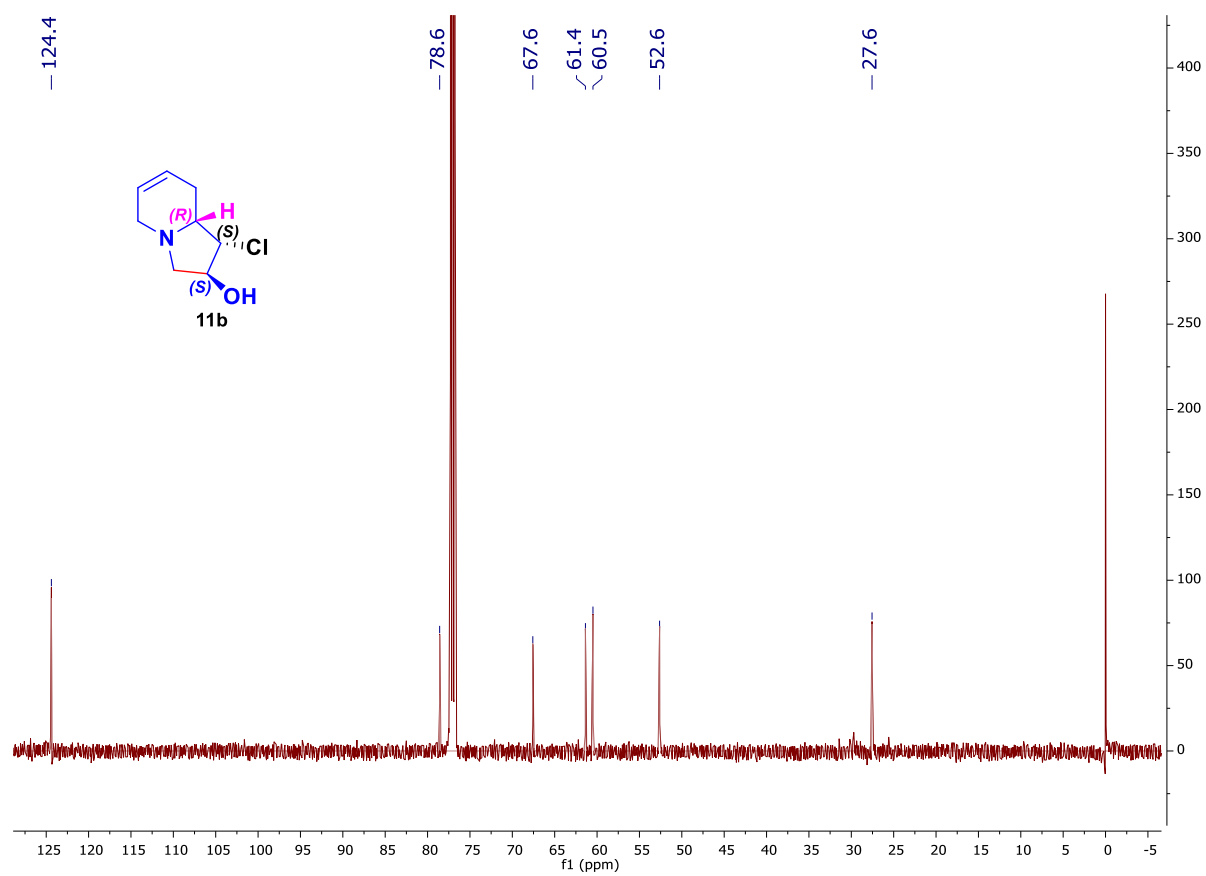

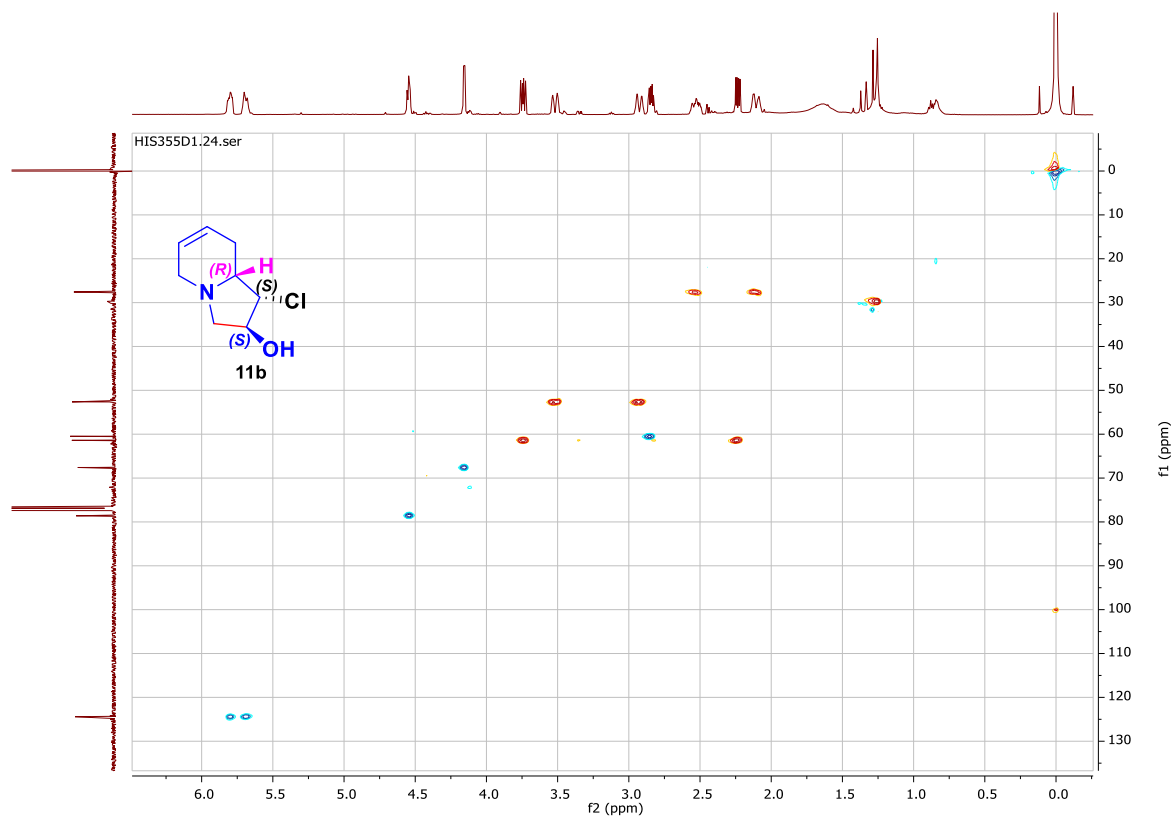

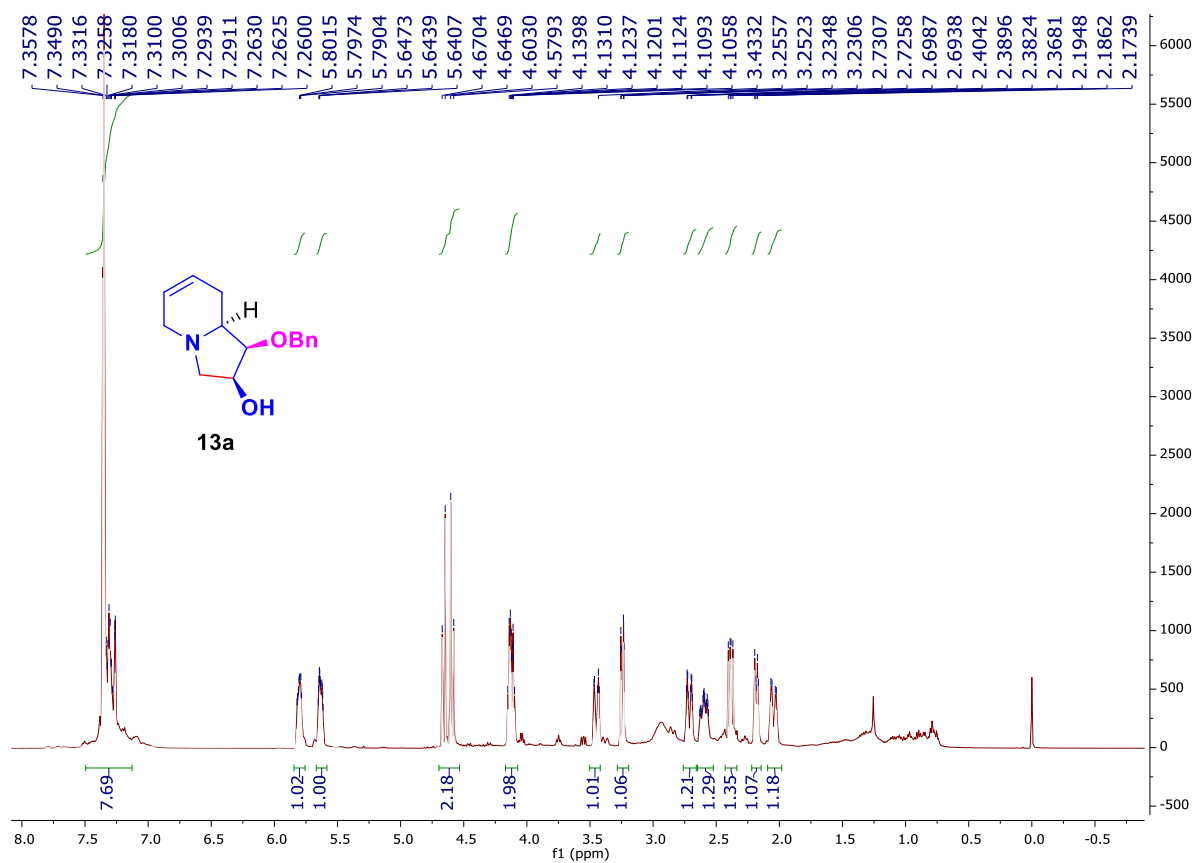

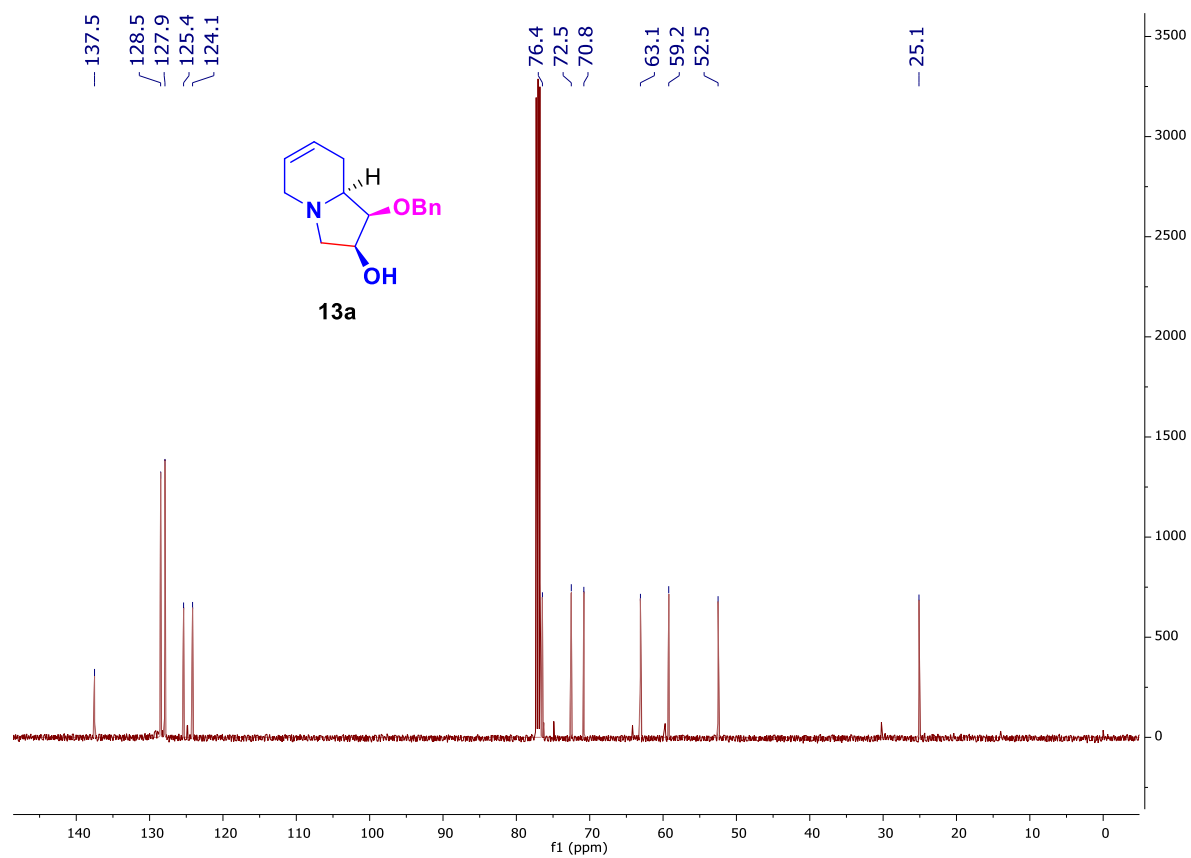

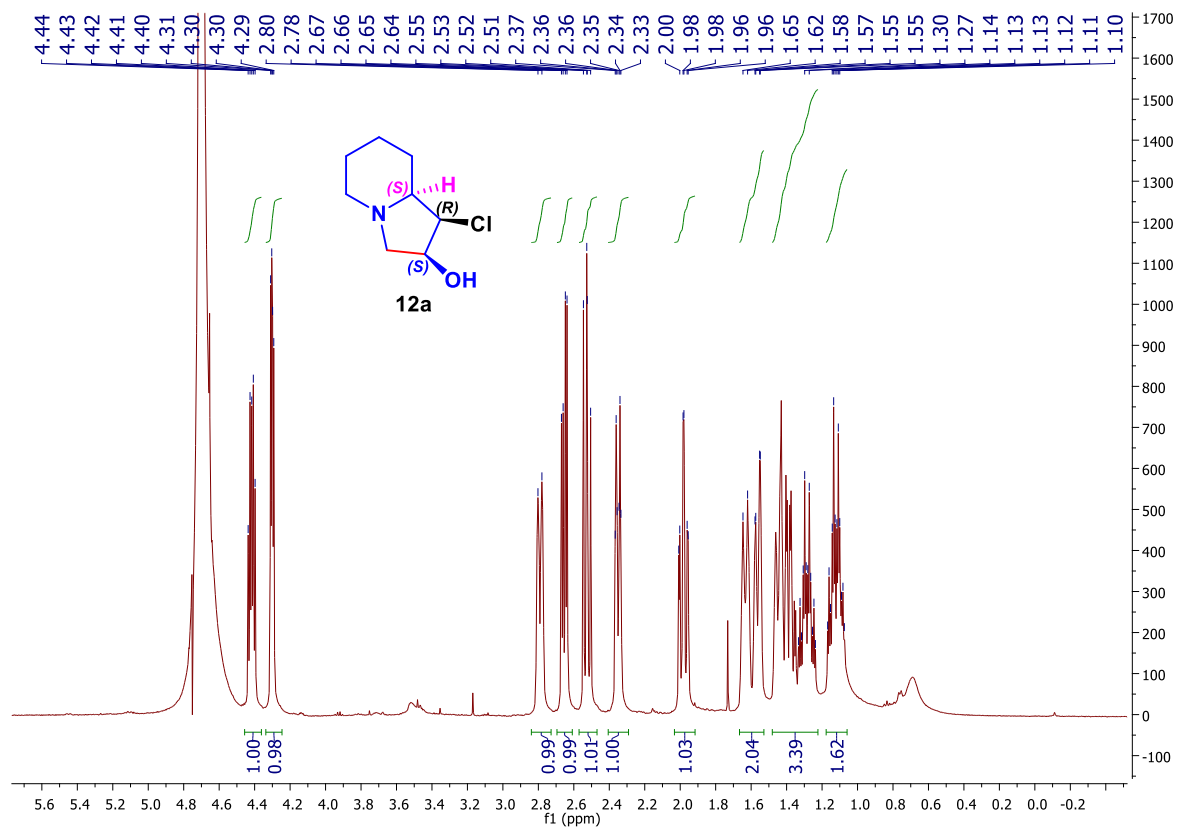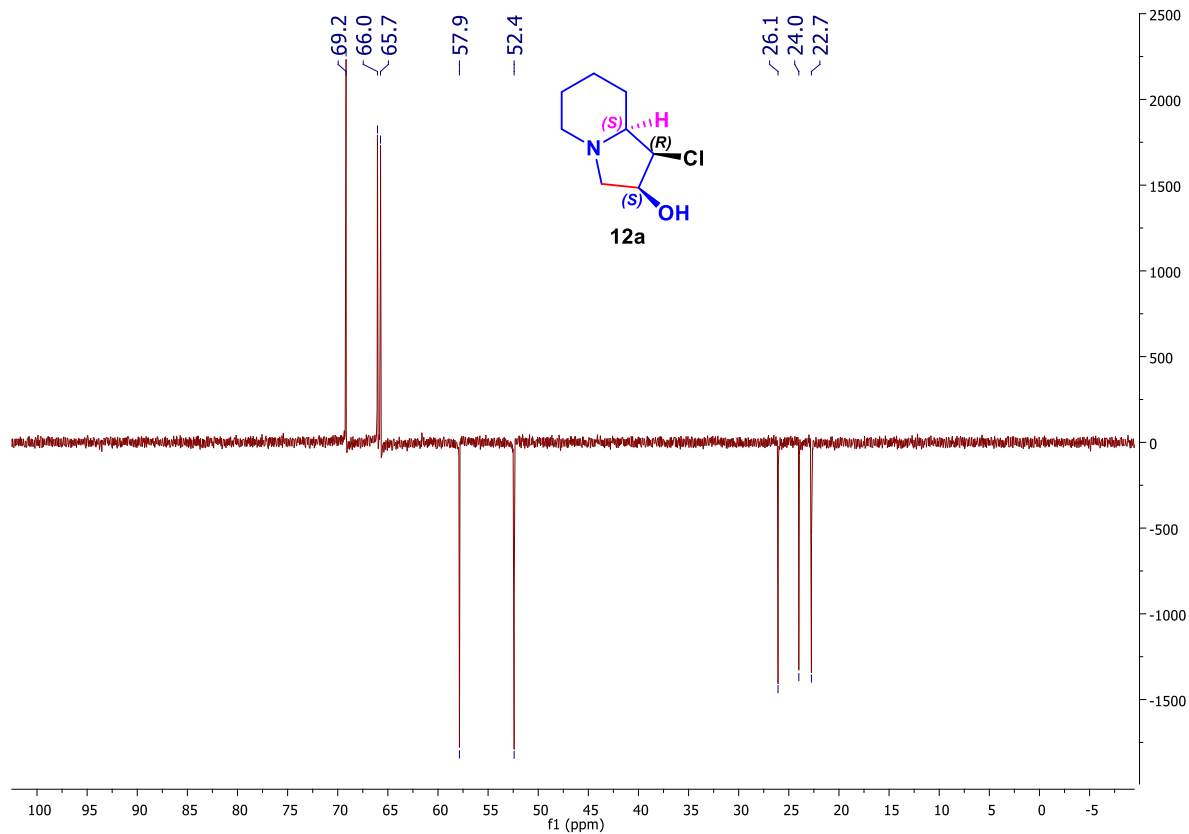

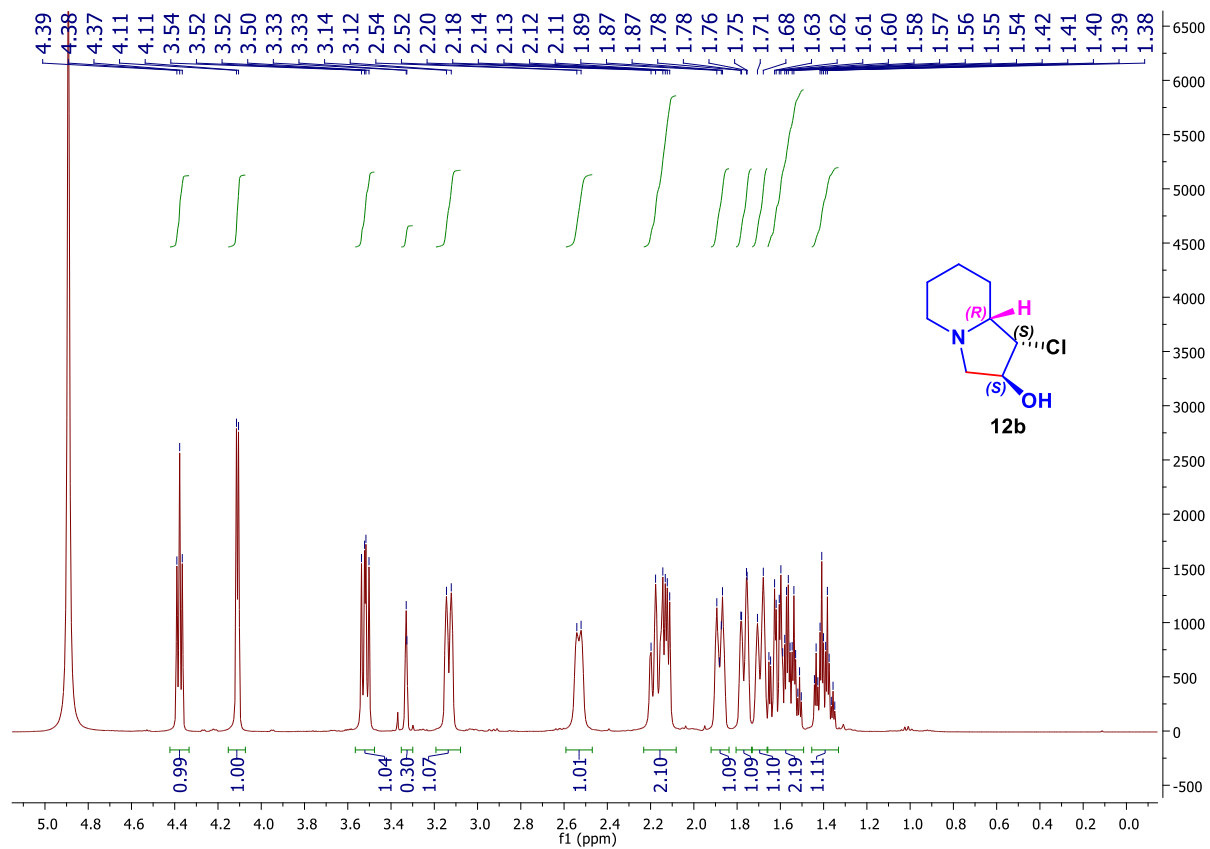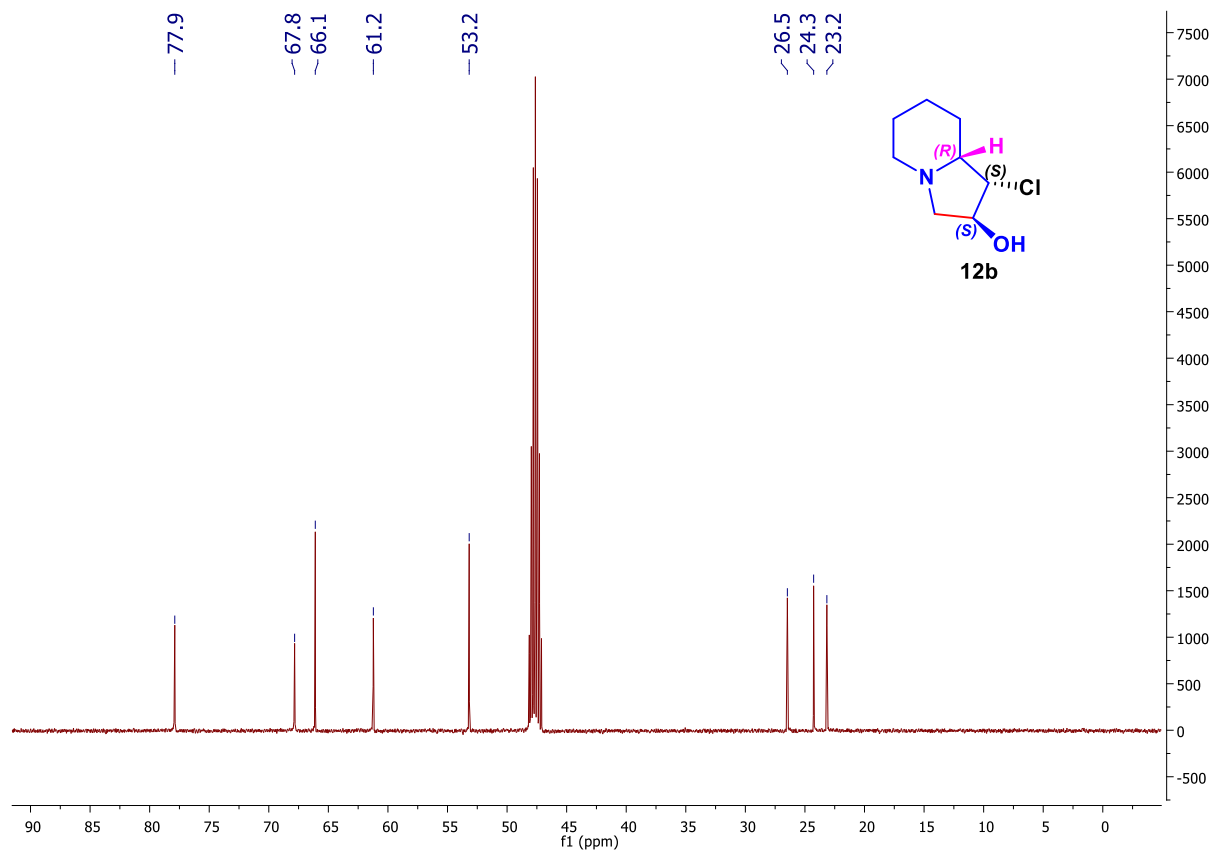

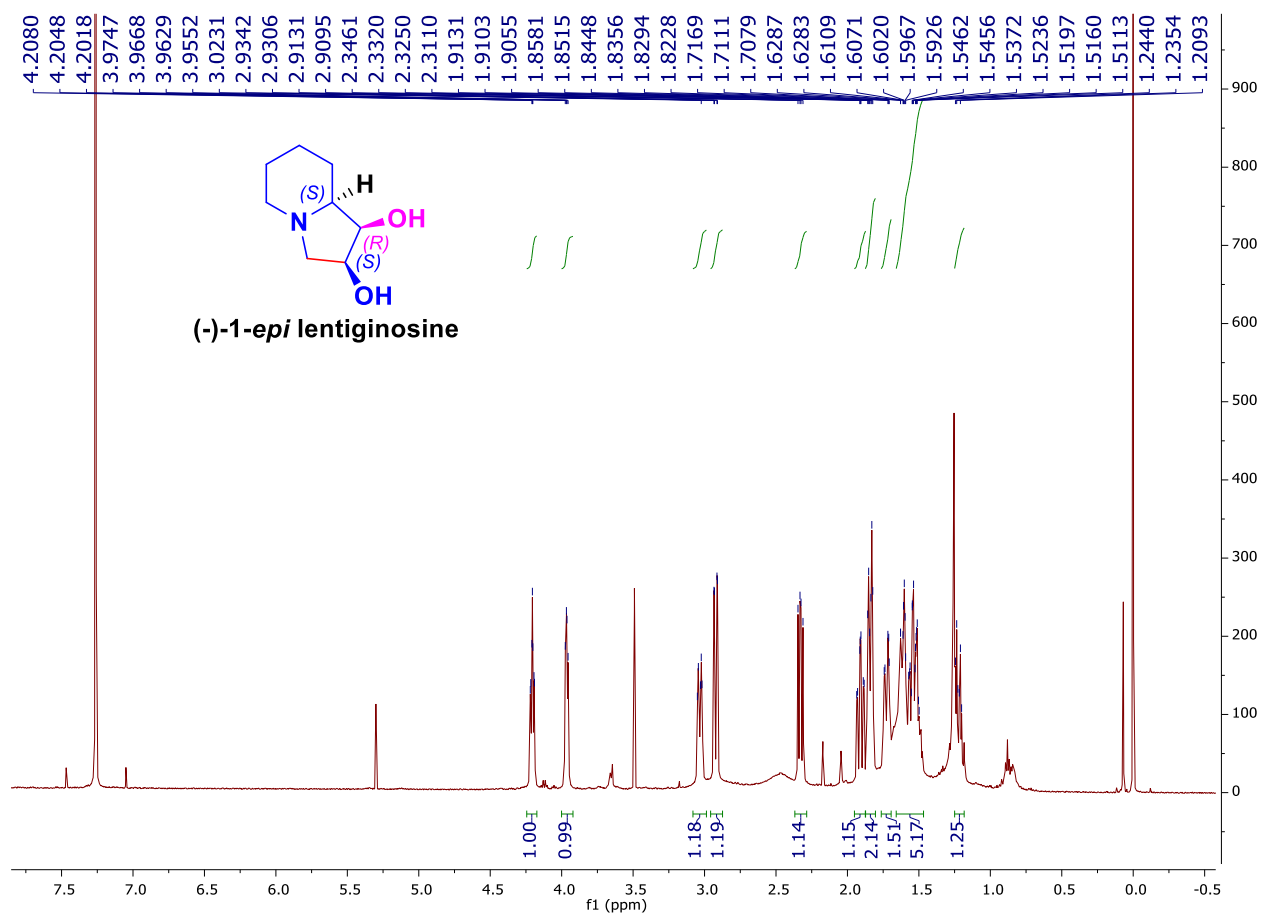



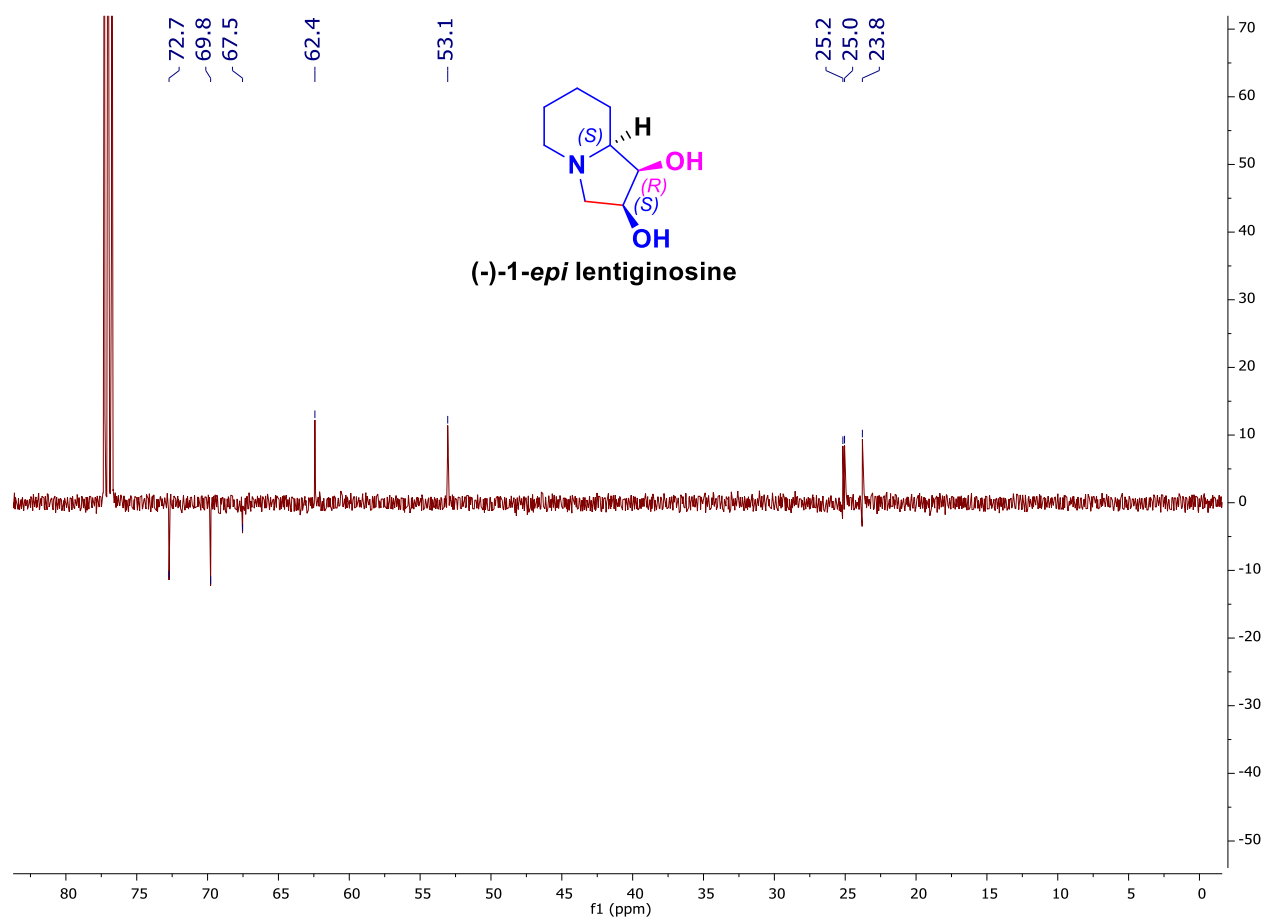

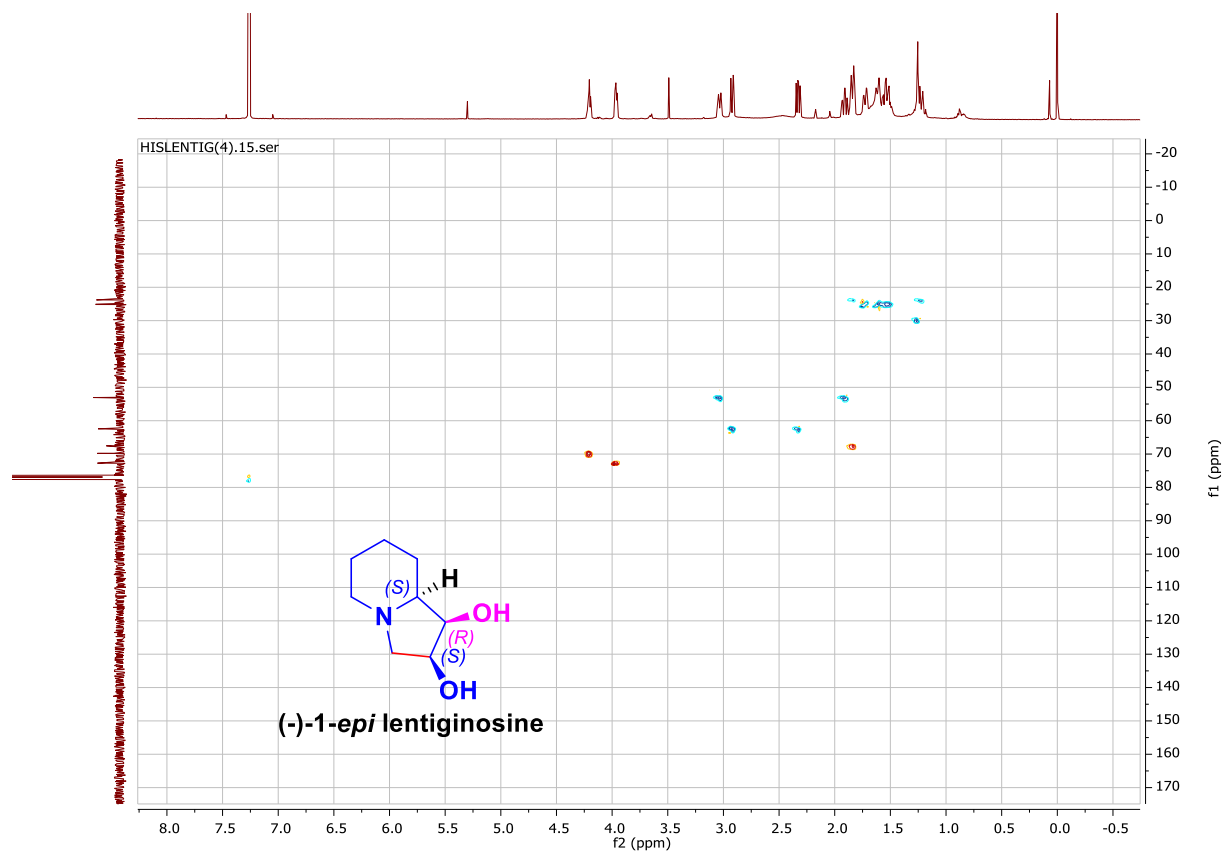

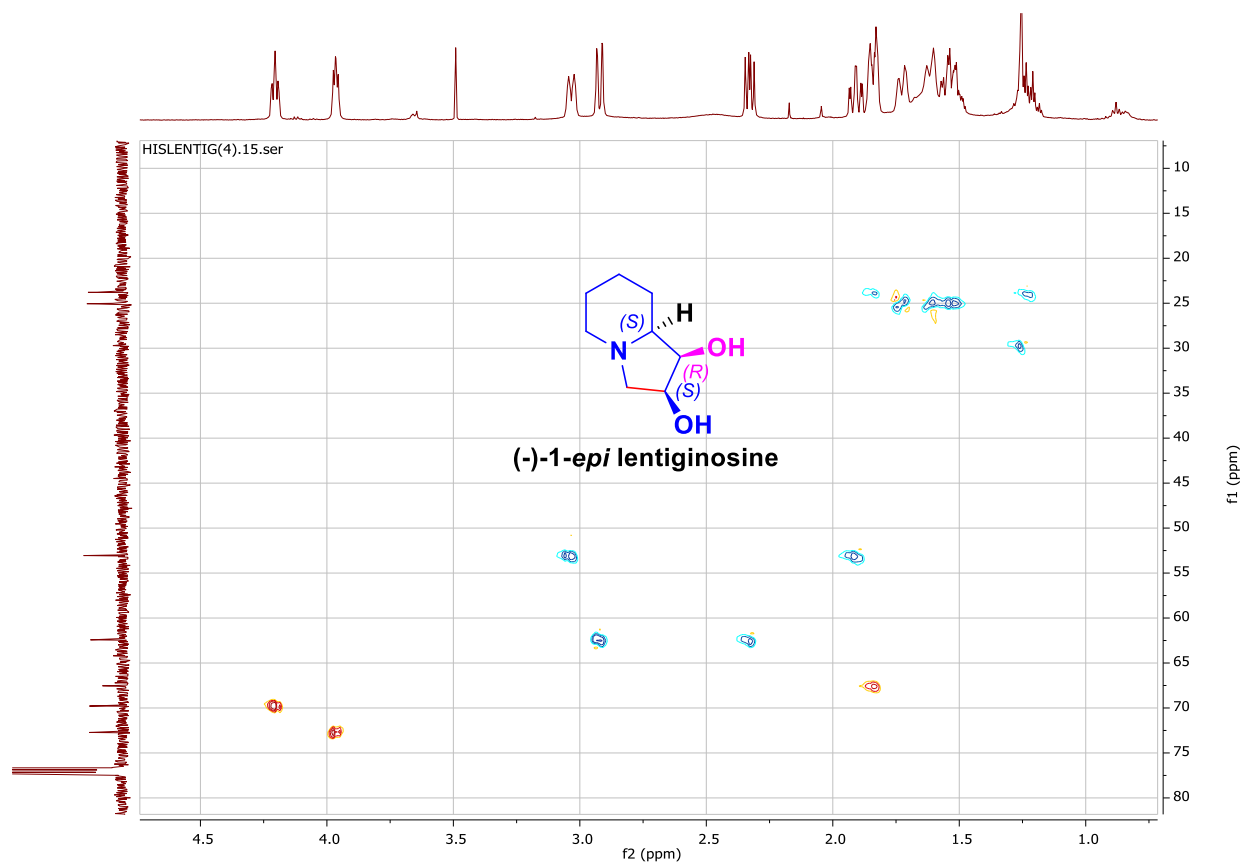

**Table S1.** Crystal data for compounds **3**, **11a**, **11b** and **12a**

|                                                                             | <b>3</b>                                                        | <b>11a</b>                                            | <b>11b</b>                                            | <b>12a</b>                                            |
|-----------------------------------------------------------------------------|-----------------------------------------------------------------|-------------------------------------------------------|-------------------------------------------------------|-------------------------------------------------------|
| CCDC deposition                                                             | 2181510                                                         | 2181511                                               | 2181512                                               | 2181513                                               |
| Formula                                                                     | C <sub>20</sub> H <sub>23</sub> BrN <sub>2</sub> O <sub>3</sub> | C <sub>8</sub> H <sub>12</sub> ClNO                   | C <sub>8</sub> H <sub>12</sub> ClNO                   | C <sub>8</sub> H <sub>14</sub> ClNO                   |
| fw                                                                          | 419.31                                                          | 173.64                                                | 173.64                                                | 175.65                                                |
| Crystal size (mm <sup>3</sup> )                                             | 0.34×0.22×0.07                                                  | 0.50×0.11×0.08                                        | 0.30×0.13×0.04                                        | 0.61×0.42×0.35                                        |
| Colour                                                                      | colourless                                                      | colourless                                            | colourless                                            |                                                       |
| Space group                                                                 | <i>P</i> 2 <sub>1</sub> 2 <sub>1</sub> 2 <sub>1</sub>           | <i>P</i> 2 <sub>1</sub> 2 <sub>1</sub> 2 <sub>1</sub> | <i>P</i> 2 <sub>1</sub> 2 <sub>1</sub> 2 <sub>1</sub> | <i>P</i> 2 <sub>1</sub> 2 <sub>1</sub> 2 <sub>1</sub> |
| <i>a</i> (Å)                                                                | 7.1360(3)                                                       | 7.3321(12)                                            | 10.8339(10)                                           | 7.4256(2)                                             |
| <i>b</i> (Å)                                                                | 8.9300(6)                                                       | 10.641(2)                                             | 6.7230(9)                                             | 10.5444(4)                                            |
| <i>c</i> (Å)                                                                | 30.3879(14)                                                     | 11.146(2)                                             | 11.3873(10)                                           | 11.2574(5)                                            |
| <i>V</i> (Å <sup>3</sup> )                                                  | 1936.45(18)                                                     | 869.6(3)                                              | 829.41(15)                                            | 881.44(6)                                             |
| <i>Z</i> , <i>Z'</i>                                                        | 4, 1                                                            | 4, 1                                                  | 4, 1                                                  | 4, 1                                                  |
| Diffractometer                                                              | Stoe Stadivari                                                  | Stoe Stadivari                                        | Stoe Stadivari                                        | Stoe Stadivari                                        |
| Radiation                                                                   | Ag Kα                                                           | Ag Kα                                                 | Ag Kα                                                 | Ag Kα                                                 |
| <i>T</i> (K)                                                                | 294(1)                                                          | 294(1)                                                | 294(1)                                                | 295(1)                                                |
| Density (g.cm <sup>-3</sup> )                                               | 1.438                                                           | 1.326                                                 | 1.391                                                 | 1.324                                                 |
| Absorption coef. (mm <sup>-1</sup> )                                        | 1.155                                                           | 0.201                                                 | 0.211                                                 | 0.198                                                 |
| Transmission factors                                                        | 0.5253 – 1.0000                                                 | 0.5177 – 1.0000                                       | 0.4573 – 1.0000                                       | 0.6181 – 1.0000                                       |
| Refl. collected ( <i>R</i> <sub>int</sub> )                                 | 27808 (0.0741)                                                  | 16944 (0.0715)                                        | 20777 (0.0761)                                        | 39302 (0.0230)                                        |
| Refl. independent                                                           | 4645                                                            | 2040                                                  | 1935                                                  | 2656                                                  |
| ( <i>Sen</i> θ)/λ (Å <sup>-1</sup> )                                        | 0.67                                                            | 0.65                                                  | 0.65                                                  | 0.71                                                  |
| Data / parameters / restraints                                              | 4645 / 249 / 0                                                  | 2040 / 103 / 0                                        | 1935 / 103 / 0                                        | 2656 / 105 / 0                                        |
| Flack parameter                                                             | <i>x</i> = 0.034(13)                                            | <i>x</i> = -0.01(7)                                   | <i>x</i> = 0.01(6)                                    | <i>x</i> = 0.028(15)                                  |
| <i>R</i> <sub>1</sub> , <i>wR</i> <sub>2</sub> [ <i>I</i> > 2σ( <i>I</i> )] | 0.0344, 0.0576                                                  | 0.0311, 0.0528                                        | 0.0308, 0.0640                                        | 0.0295, 0.0794                                        |
| <i>R</i> <sub>1</sub> , <i>wR</i> <sub>2</sub> [all data]                   | 0.1024, 0.0683                                                  | 0.0638, 0.0590                                        | 0.0479, 0.0674                                        | 0.0335, 0.0841                                        |
| GOF on <i>F</i> <sup>2</sup>                                                | 0.817                                                           | 0.784                                                 | 0.864                                                 | 1.066                                                 |

X-ray intensities were collected at room temperature on a Stoe-Stadivari diffractometer equipped with an Axo microfocus source (Ag Kα radiation, λ = 0.56083 Å) and a Dectris Pilatus 100K detector [1]. Structures were refined with SHELXL [2]. For compound **3**, the O atom of the oxazolidine ring is disordered over two positions, O3A and O3B, placed above and below the mean plane of this heterocycle. Occupancies for these sites were refined to 0.37(2) and 0.63(2) for O3A and O3B, respectively. No disordered parts were detected in the other compounds. For all compounds, the refined Flack parameter is consistent with the absolute configuration expected from the synthetic procedure. In all cases, all H atoms bonded to C atoms were placed in calculated positions, while hydroxy H atoms positions were determined from difference maps, and refined with free coordinates. All isotropic displacement parameters for H atoms are calculated from the equivalent displacement parameters of their carrier C/O atoms. Structure factors can be found in the Cif files deposited with the CCDC. Checkcif/PLATON reports are copied below, which do not raise A/B-level issues.

[1] Stoe & Cie (2019). X-AREA and X-RED32. Stoe & Cie, Darmstadt, Germany.

[2] Sheldrick, G. M. (2015). *Acta Cryst. C* **71**, 3-8.

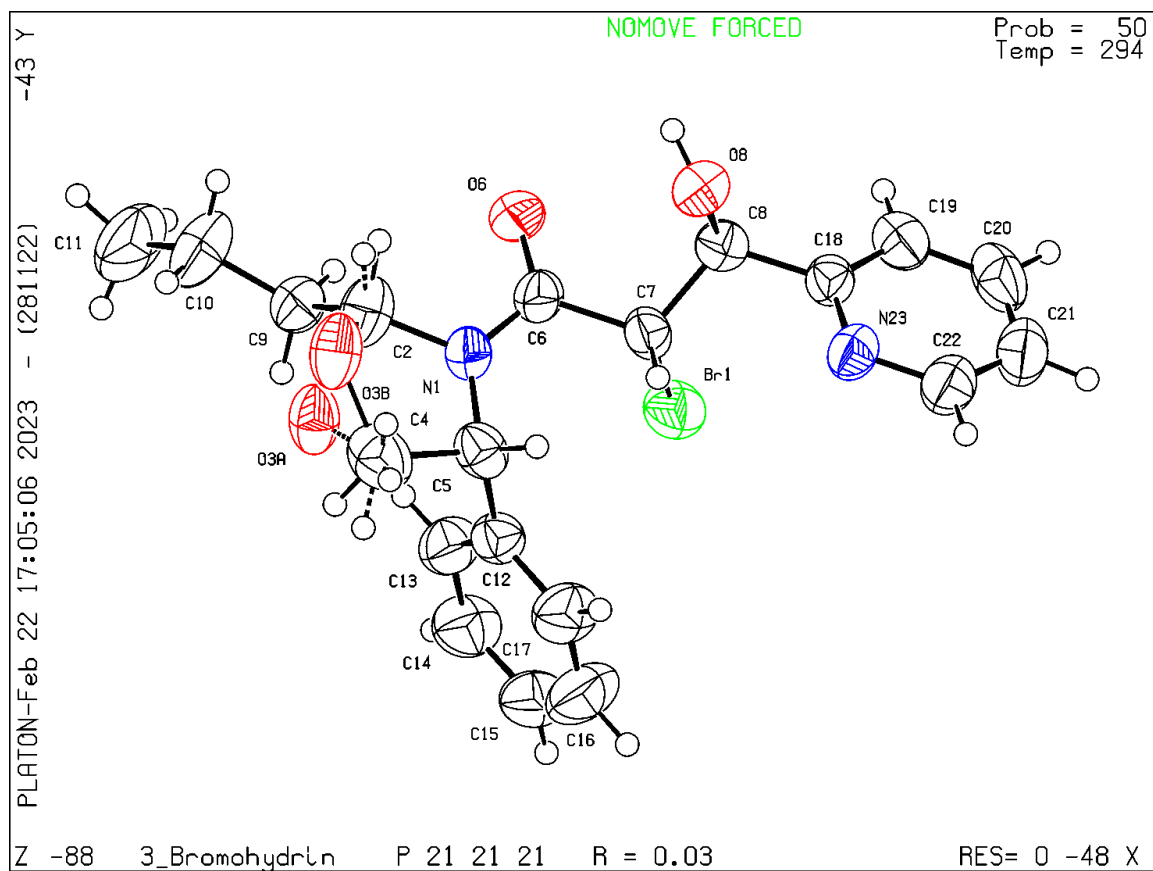



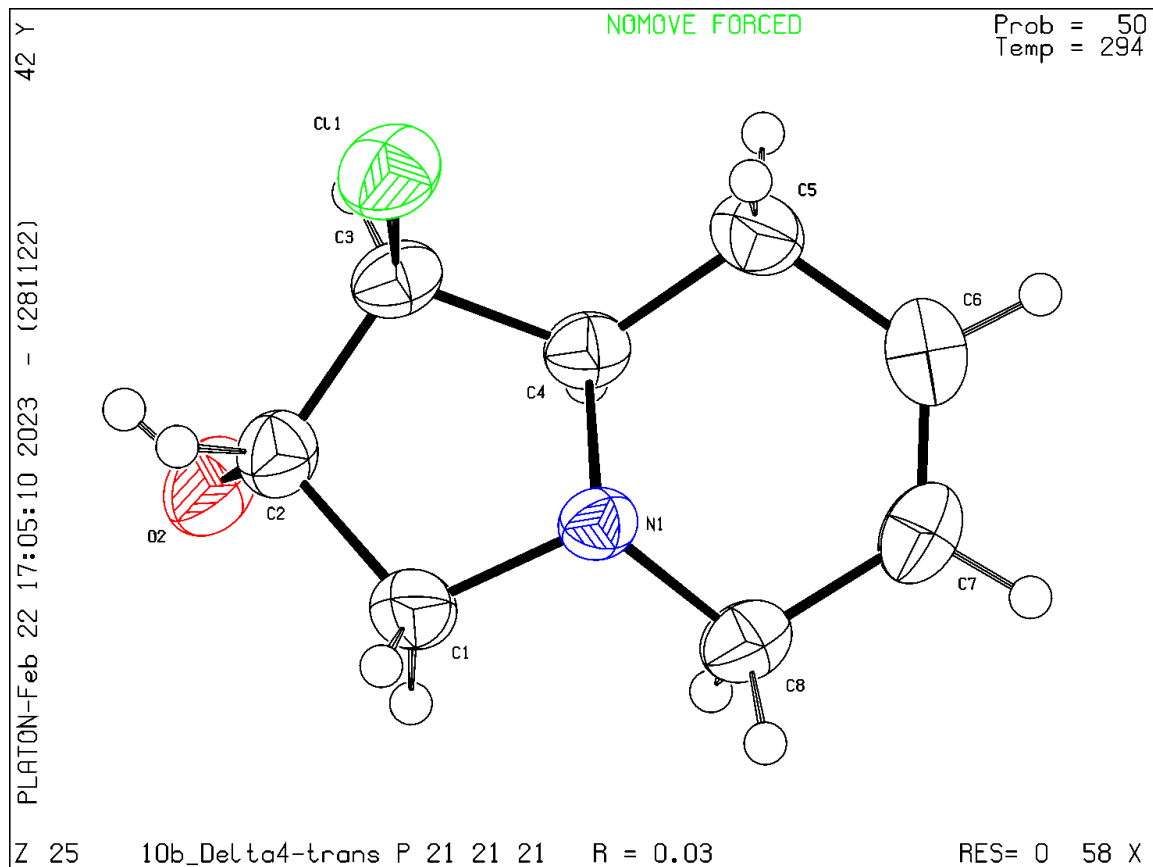

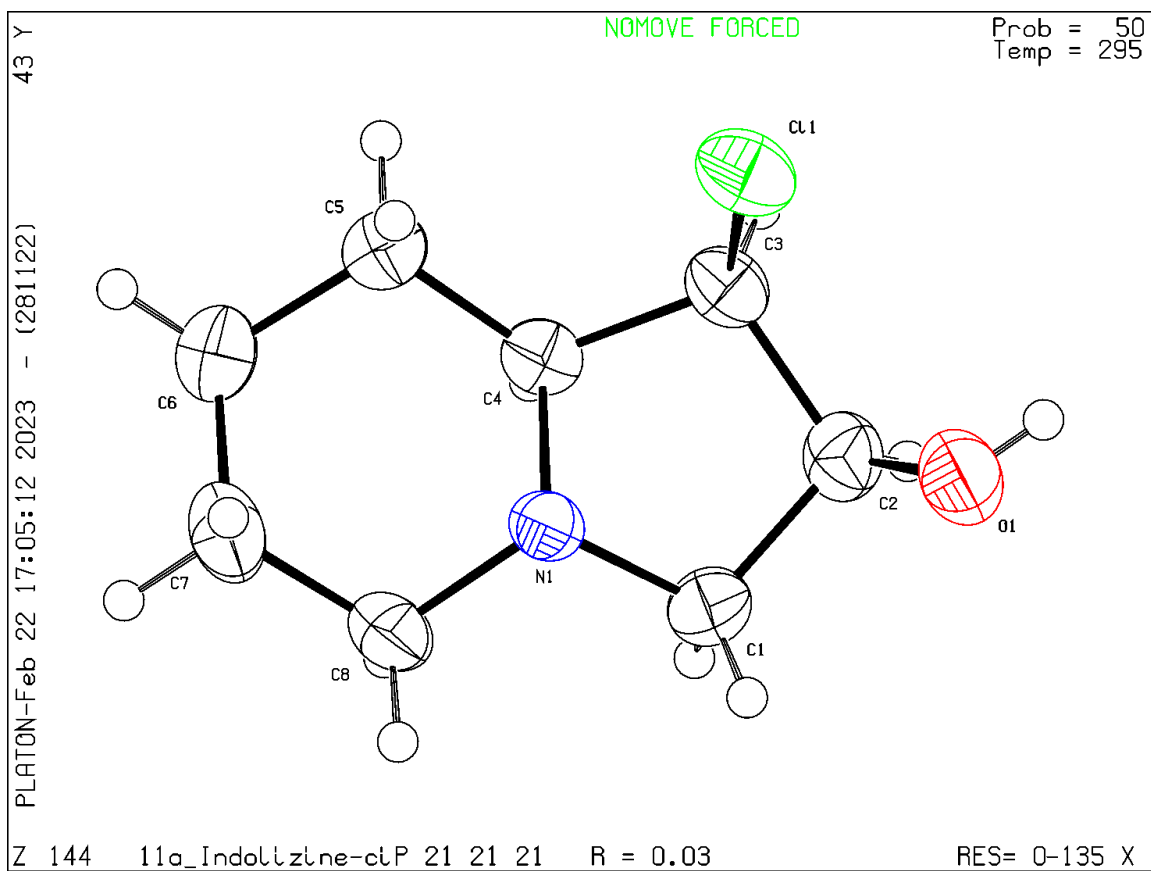

Supplement: s1 [file s1]
